# Supplementary material for: Palladium(ii) complexes bearing the 1,2,3-triazole based organosulfur/ selenium ligand: synthesis, structure and applications in Heck and Suzuki–Miyaura coupling as a catalyst via palladium nanoparticles
Source: Royal Society of Chemistry journal article supplement (doi:10.1039/c4ra09574j), 2014-10-21
Supplement: c4ra09574j1.pdf [file c4ra09574j1.pdf]

## ESI for

### Palladium(II) complexes bearing 1,2,3-triazole based organosulfur/ selenium ligand: synthesis, structure and applications in Heck and Suzuki-Miyaura coupling as catalyst via palladium nanoparticles

Fariha Saleem, G. K. Rao, Arun Kumar, Satyendra Kumar, Mahabir P. Singh and Ajai K. Singh\*

Department of Chemistry, Indian Institute of Technology Delhi, New Delhi-110016, India

E-mail: [aksingh@chemistry.iitd.ac.in](mailto:aksingh@chemistry.iitd.ac.in), [ajai57@hotmail.com](mailto:ajai57@hotmail.com)

**Table S1** Crystal data and structural refinements for Complexes 1 / 2

| Compounds                                                       | 1                                                                                                                                           | 2                                                                                                                                        |
|-----------------------------------------------------------------|---------------------------------------------------------------------------------------------------------------------------------------------|------------------------------------------------------------------------------------------------------------------------------------------|
| Empirical formula                                               | <b>C<sub>16</sub> H<sub>15</sub> Cl<sub>2</sub> N<sub>3</sub> Pd S</b>                                                                      | <b>C<sub>16</sub> H<sub>15</sub> Cl<sub>2</sub> N<sub>3</sub> Pd Se</b>                                                                  |
| Formula wt.                                                     | 458.68                                                                                                                                      | 505.57                                                                                                                                   |
| Crystal size [mm]                                               | 0.34×0.31×0.23                                                                                                                              | 0.48×0.25×0.22                                                                                                                           |
| Crystal system                                                  | Monoclinic                                                                                                                                  | Orthorhombic                                                                                                                             |
| Space group                                                     | P2(1)/c                                                                                                                                     | P2(1)2(1)2(1)                                                                                                                            |
| Unit Cell dimension                                             | <i>a</i> = 8.482(3) Å<br><i>b</i> = 11.062(4) Å<br><i>c</i> = 18.913(7) Å<br>$\alpha$ = 90.00°<br>$\beta$ = 92.849(6)°<br>$\gamma$ = 90.00° | <i>a</i> = 8.8269(19) Å<br><i>b</i> = 9.289(2) Å<br><i>c</i> = 20.716(4) Å<br>$\alpha$ = 90.00°<br>$\beta$ = 90.00°<br>$\gamma$ = 90.00° |
| Volume [Å <sup>3</sup> ]                                        | 1772.4(11)                                                                                                                                  | 1698.6(6)                                                                                                                                |
| <i>Z</i>                                                        | 4                                                                                                                                           | 4                                                                                                                                        |
| $\rho_{\text{calcd}}$ [g/cm <sup>3</sup> ]                      | 1.719                                                                                                                                       | 1.977                                                                                                                                    |
| $\mu(\text{MoK}\alpha)$ [mm <sup>-1</sup> ]                     | 1.467                                                                                                                                       | 3.551                                                                                                                                    |
| <i>F</i> (000)                                                  | 912.0                                                                                                                                       | 984.0                                                                                                                                    |
| $\theta$ range [°]                                              | 2.13–25.00                                                                                                                                  | 1.97–24.99                                                                                                                               |
| Index ranges                                                    | -10 ≤ <i>h</i> ≤ 10<br>-13 ≤ <i>k</i> ≤ 13<br>-22 ≤ <i>l</i> ≤ 22                                                                           | -10 ≤ <i>h</i> ≤ 10<br>-11 ≤ <i>k</i> ≤ 11<br>-24 ≤ <i>l</i> ≤ 24                                                                        |
| Reflections collected                                           | 16478                                                                                                                                       | 16232                                                                                                                                    |
| Independent reflections( <i>R</i> <sub>int.</sub> )             | 3116 (0.0363)                                                                                                                               | 2998 (0.0477)                                                                                                                            |
| Completeness to max. $\theta$ [%]                               | 100                                                                                                                                         | 100                                                                                                                                      |
| Max./min. Transmission                                          | 0.610 / 0.717                                                                                                                               | 0.072 / 0.036                                                                                                                            |
| Data/restraints/ parameters                                     | 3116 / 0 / 208                                                                                                                              | 2998 / 0 / 208                                                                                                                           |
| Goodness-of-fit on <i>F</i> <sup>2</sup>                        | 1.278                                                                                                                                       | 1.147                                                                                                                                    |
| Final <i>R</i> indices<br>[ <i>I</i> > 2 $\sigma$ ( <i>I</i> )] | <i>R</i> <sub>1</sub> = 0.0472,<br><i>wR</i> <sub>2</sub> = 0.0943                                                                          | <i>R</i> <sub>1</sub> = 0.0355,<br><i>wR</i> <sub>2</sub> = 0.0782                                                                       |
| <i>R</i> indices (all data)                                     | <i>R</i> <sub>1</sub> = 0.0507,<br><i>wR</i> <sub>2</sub> = 0.0959                                                                          | <i>R</i> <sub>1</sub> = 0.0389,<br><i>wR</i> <sub>2</sub> = 0.0794                                                                       |
| Largest diff. peak/hole[e.Å <sup>-3</sup> ]                     | 0.874 / -0.852                                                                                                                              | 0.979 / -0.483                                                                                                                           |

**Table S2** Selected bond lengths [ $\text{\AA}$ ] and bond angles [ $^\circ$ ]

| Compounds | Bond length [ $\text{\AA}$ ] |            | Bond angle [ $^\circ$ ] |            |
|-----------|------------------------------|------------|-------------------------|------------|
| <b>1</b>  | N(3)—Pd(1)                   | 2.005(4)   | N(3)—Pd(1)—Cl(1)        | 174.04(11) |
|           | Pd(1)—S(1)                   | 2.2727(14) | N(3)—Pd(1)—Cl(2)        | 92.72(11)  |
|           | Cl(1)—Pd(1)                  | 2.2968(14) | S(1)—Pd(1)—Cl(1)        | 89.01(5)   |
|           | Cl(2)—Pd(1)                  | 2.3003(13) | S(1)—Pd(1)—Cl(2)        | 177.91(5)  |
|           | N(2)—N(3)                    | 1.312(5)   | Cl(1)—Pd(1)—Cl(2)       | 93.09(5)   |
|           | C(10)—S(1)                   | 1.826(5)   | N(3)—Pd(1)—S(1)         | 85.18(11)  |
|           | C(11)—S(1)                   | 1.786(5)   | C(11)—S(1)—C(10)        | 102.3(3)   |
|           | C(9)—N(3)                    | 1.368(6)   | C(11)—S(1)—Pd(1)        | 107.07(17) |
|           |                              |            | C(10)—S(1)—Pd(1)        | 99.45(17)  |
| <b>2</b>  | Pd(1)—N(3)                   | 2.005(4)   | N(3)—Pd(1)—Cl(1)        | 173.41(14) |
|           | Pd(1)—Cl(1)                  | 2.2799(15) | N(3)—Pd(1)—Cl(2)        | 95.32(14)  |
|           | Pd(1)—Cl(2)                  | 2.3146(16) | Cl(1)—Pd(1)—Cl(2)       | 91.22(6)   |
|           | Pd(1)—Se(1)                  | 2.3693(8)  | N(3)—Pd(1)—Se(1)        | 85.37(13)  |
|           | Se(1)—C(10)                  | 1.985(6)   | Cl(1)—Pd(1)—Se(1)       | 88.11(4)   |
|           | C(11)—Se(1)                  | 1.942(6)   | Cl(2)—Pd(1)—Se(1)       | 178.20(5)  |
|           | N(2)—N(3)                    | 1.326(6)   | C(11)—Se(1)—C(10)       | 98.9(3)    |
|           | N(3)—C(9)                    | 1.373(7)   | C(11)—Se(1)—Pd(1)       | 104.41(17) |
|           |                              |            | C(10)—Se(1)—Pd(1)       | 96.77(19)  |

**Table S3** Non-covalent interactions C—H $\cdots$ Cl distances [ $\text{\AA}$ ] of **1** / **2**

| <b>1</b>                    |          | <b>2</b>                    |          |
|-----------------------------|----------|-----------------------------|----------|
| C(10)—H(10A) $\cdots$ Cl(1) | 2.815(2) | C(18)—H(18) $\cdots$ Cl(2)  | 3.026(2) |
| C(10)—H(10B) $\cdots$ Cl(1) | 3.033(2) | C(16)—H(16) $\cdots$ Cl(2)  | 3.122(2) |
| C(12)—H(12) $\cdots$ Cl(2)  | 2.822(2) | C(10)—H(10A) $\cdots$ Cl(1) | 3.328(2) |
| C(8)—H(8) $\cdots$ Cl(1)    | 2.883(5) | C(8)—H(8) $\cdots$ Cl(2)    | 3.051(2) |
| C(8)—H(8) $\cdots$ Cl(2)    | 2.635(3) | C(8)—H(8) $\cdots$ Cl(1)    | 2.790(2) |
| C(7)—H(7A) $\cdots$ Cl(1)   | 2.789(2) | C(7)—H(7A) $\cdots$ Cl(2)   | 2.959(2) |
| C(7)—H(7B) $\cdots$ Cl(2)   | 2.932(2) | C(6)—H(6) $\cdots$ Cl(1)    | 3.150(2) |
|                             |          | C(4)—H(4) $\cdots$ Cl(1)    | 3.059(2) |

**Table S4** Selected bond lengths (Å) and angles (°) for **1** / **2** and the values calculated from DFT studies

| <b>1</b>            |            |        | <b>2</b>            |            |        |
|---------------------|------------|--------|---------------------|------------|--------|
| Bond length / angle |            |        | Bond length / angle |            |        |
| N(3)—Pd(1)          | 2.005(4)   | 2.100  | N(3)—Pd(1)          | 2.005(4)   | 2.099  |
| S(1)—Pd(1)          | 2.2727(14) | 2.513  | Se(1)—Pd(1)         | 2.3693(8)  | 2.566  |
| Cl(1)—Pd(1)         | 2.2968(14) | 2.371  | Cl(1)—Pd(1)         | 2.2799(15) | 2.328  |
| Cl(2)—Pd(1)         | 2.3003(13) | 2.314  | Cl(2)—Pd(1)         | 2.3146(16) | 2.325  |
| S(1)—C(10)          | 1.826(5)   | 1.908  | Se(1)—C(10)         | 1.985(6)   | 2.040  |
| S(1)—C(11)          | 1.786(5)   | 1.855  | Se(1)—C(11)         | 1.942(6)   | 1.971  |
| S(1)—Pd—Cl(1)       | 177.91(5)  | 175.35 | Se(1)—Pd—Cl(1)      | 178.20(5)  | 175.44 |
| N3—Pd—Cl(2)         | 174.04(11) | 173.89 | N3—Pd—Cl(2)         | 173.41(14) | 174.76 |
| N3—Pd—Cl(1)         | 92.72(11)  | 93.39  | N3—Pd—Cl(1)         | 95.32(14)  | 93.39  |
| S(1)—Pd—N(3)        | 85.18(11)  | 82.59  | Se(1)—Pd—N(3)       | 85.37(13)  | 82.90  |
| Cl(2)—Pd—Cl(1)      | 93.09(5)   | 92.58  | Cl(2)—Pd—Cl(1)      | 91.22(6)   | 92.30  |
| S(1)—Pd—Cl(2)       | 89.01(5)   | 91.50  | Se(1)—Pd—Cl(2)      | 88.11(4)   | 92.02  |

**Table S5** HOMO-LUMO energy gap of the **1** / **2** Mulliken partial atomic charge

| Complex  | Mulliken partial atomic charge |        |          |               |       |        |        |
|----------|--------------------------------|--------|----------|---------------|-------|--------|--------|
|          | Energygap<br>(kcal/mol)        | Metal  | Calcogen | N of triazole |       |        | Cl     |
|          |                                |        |          | N3            | N2    | N1     |        |
| <b>1</b> | 78.5641                        | -0.038 | 0.465    | -0.326        | 0.007 | -0.196 | -0.262 |
| <b>2</b> | 78.8025                        | -0.060 | 0.520    | -0.330        | 0.015 | -0.196 | -0.279 |

## Mass Spectrum SmartFormula Report

|                      |                          |                   |                    |
|----------------------|--------------------------|-------------------|--------------------|
| <b>Analysis Info</b> |                          | Acquisition Date  | 6/25/2012 10:14:22 |
| Analysis Name        | D:\Data\June_12\FAR-1A.d | Operator          | Sharma/Singh       |
| Method               | tune_low.m               | Instrument / Ser# | micrOTOF-Q II 10:  |
| Sample Name          |                          |                   |                    |
| Comment              |                          |                   |                    |

|                              |            |                       |           |                  |           |
|------------------------------|------------|-----------------------|-----------|------------------|-----------|
| <b>Acquisition Parameter</b> |            |                       |           |                  |           |
| Source Type                  | ESI        | Ion Polarity          | Positive  | Set Nebulizer    | 0.3 Bar   |
| Focus                        | Not active | Set Capillary         | 4500 V    | Set Dry Heater   | 180 °C    |
| Scan Begin                   | 50 m/z     | Set End Plate Offset  | -500 V    | Set Dry Gas      | 4.0 l/min |
| Scan End                     | 1500 m/z   | Set Collision Cell RF | 100.0 Vpp | Set Divert Valve | Source    |

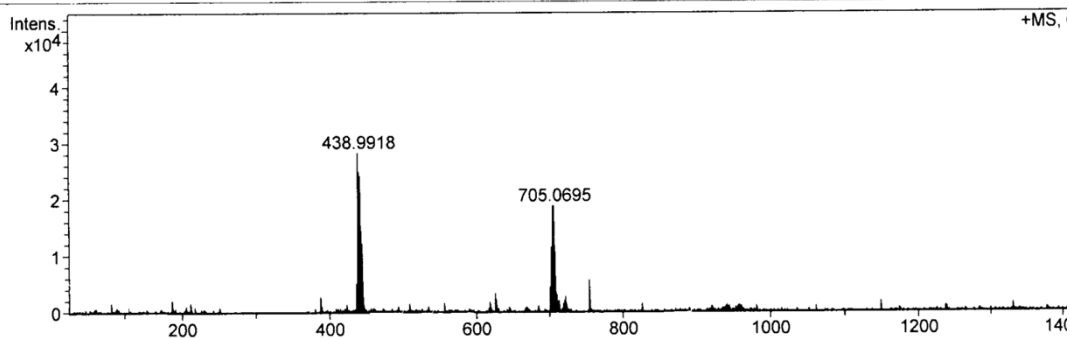

| Meas. m/z | # | Formula                                                              | Score  | m/z      | err [mDa] | err [ppm] | mSig | rdb | e <sup>-</sup> Conf |
|-----------|---|----------------------------------------------------------------------|--------|----------|-----------|-----------|------|-----|---------------------|
| 479.9304  | 1 | C <sub>16</sub> H <sub>15</sub> Cl <sub>2</sub> N <sub>3</sub> NaPdS | 100.00 | 479.9291 | -1.3      | -2.7      | 47.1 | 9.5 | even                |

**Fig. S1 Mass spectrum of 1**

## Mass Spectrum SmartFormula Report

|                      |                         |                   |                      |
|----------------------|-------------------------|-------------------|----------------------|
| <b>Analysis Info</b> |                         | Acquisition Date  | 2/22/2012 4:18:34 PM |
| Analysis Name        | D:\Data\FEB_2012\F-3A.d | Operator          | Sharma/Singh         |
| Method               | tune_wide.m             | Instrument / Ser# | micrOTOF-Q II 10262  |
| Sample Name          |                         |                   |                      |
| Comment              |                         |                   |                      |

|                              |          |                       |           |                  |           |
|------------------------------|----------|-----------------------|-----------|------------------|-----------|
| <b>Acquisition Parameter</b> |          |                       |           |                  |           |
| Source Type                  | ESI      | Ion Polarity          | Positive  | Set Nebulizer    | 0.3 Bar   |
| Focus                        | Active   | Set Capillary         | 4500 V    | Set Dry Heater   | 180 °C    |
| Scan Begin                   | 50 m/z   | Set End Plate Offset  | -500 V    | Set Dry Gas      | 4.0 l/min |
| Scan End                     | 3000 m/z | Set Collision Cell RF | 800.0 Vpp | Set Divert Valve | Source    |

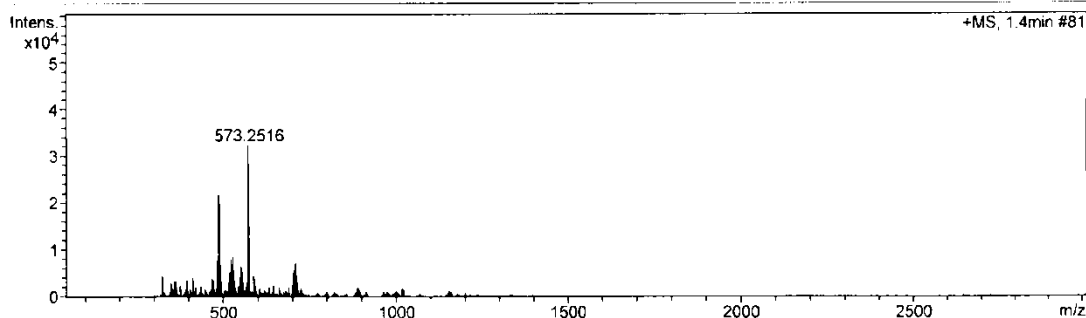

| Meas. m/z | # | Formula                                                               | m/z      | err [p] | Me an [p] | rd b | N- ul e | e <sup>-</sup> Conf | mSi gm a | Std l | St d l m/ z | St Va rN or m/ z | St d m/ z | Std Com b Dev |
|-----------|---|-----------------------------------------------------------------------|----------|---------|-----------|------|---------|---------------------|----------|-------|-------------|------------------|-----------|---------------|
| 527.8730  | 1 | C <sub>16</sub> H <sub>15</sub> Cl <sub>2</sub> N <sub>3</sub> NaPdSe | 527.8738 | 1.4     | 0.9       | 9.5  | ok      | even                | 51.8     | 38.4  | 1.8         | 7.8              | 2.1       | 842.7         |

**Fig. S2 Mass spectrum of 2**



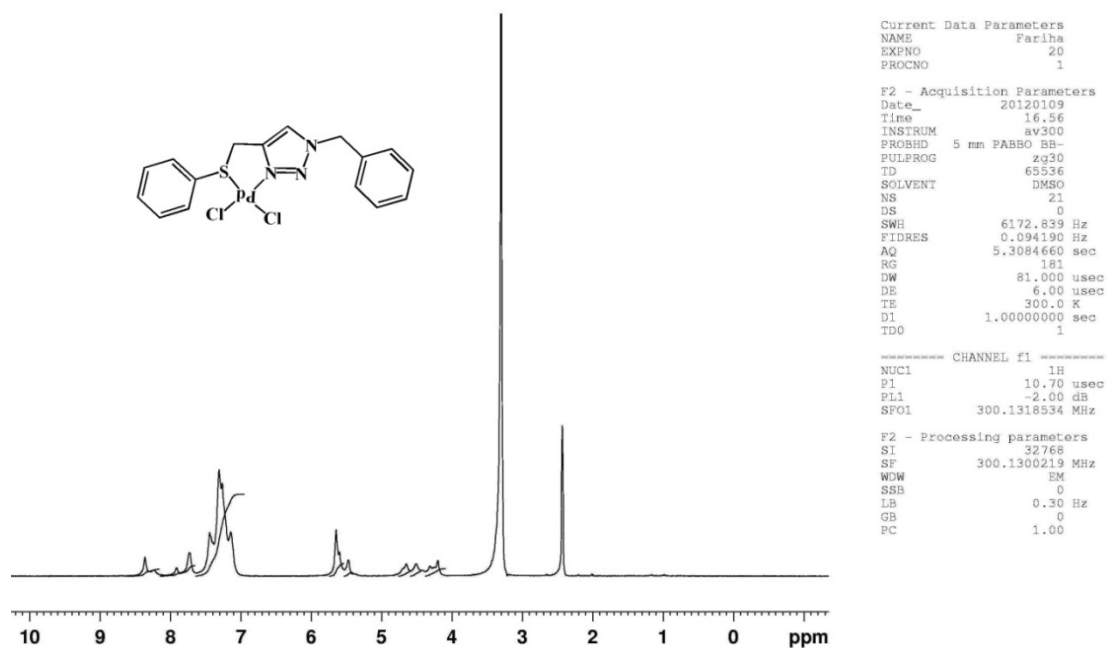

Fig. S3  $^1\text{H}$  NMR spectrum of **1**

fariha Ph-S-Click Pd Complex

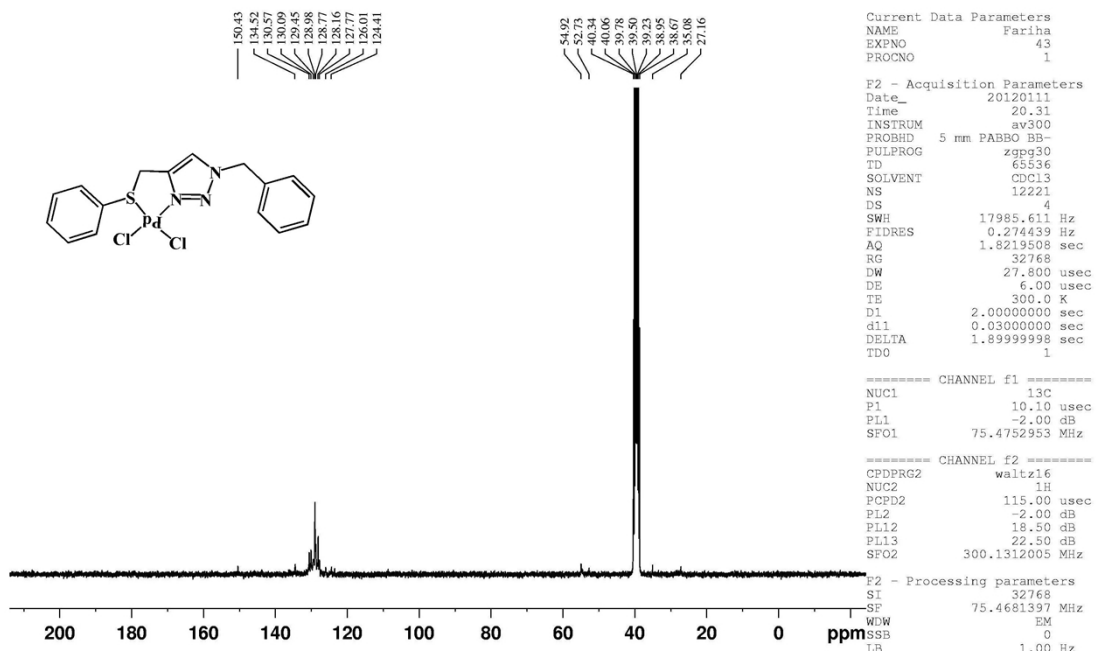

Fig. S4  $^{13}\text{C}\{^1\text{H}\}$  NMR spectrum of **1**

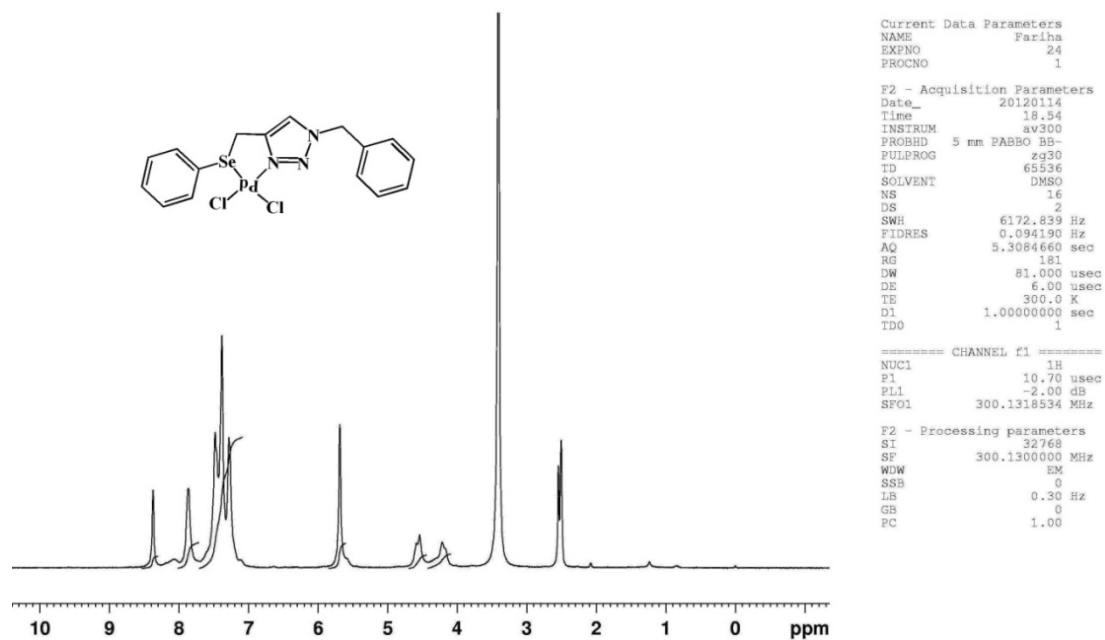

Fig. S5  $^1\text{H}$  NMR spectrum of 2

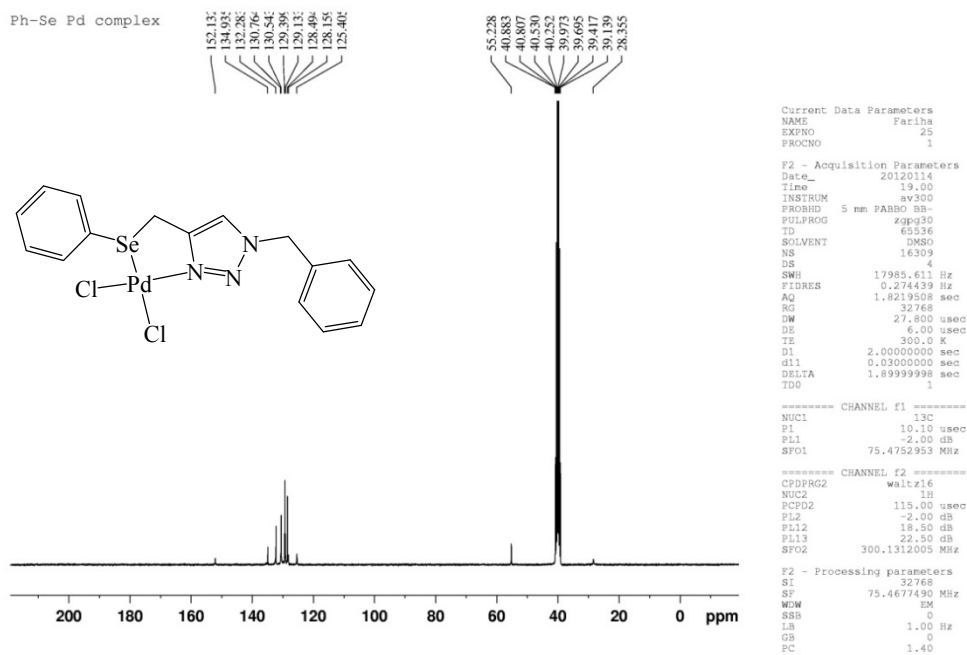

Fig. S6  $^{13}\text{C}\{^1\text{H}\}$  NMR spectrum of 2

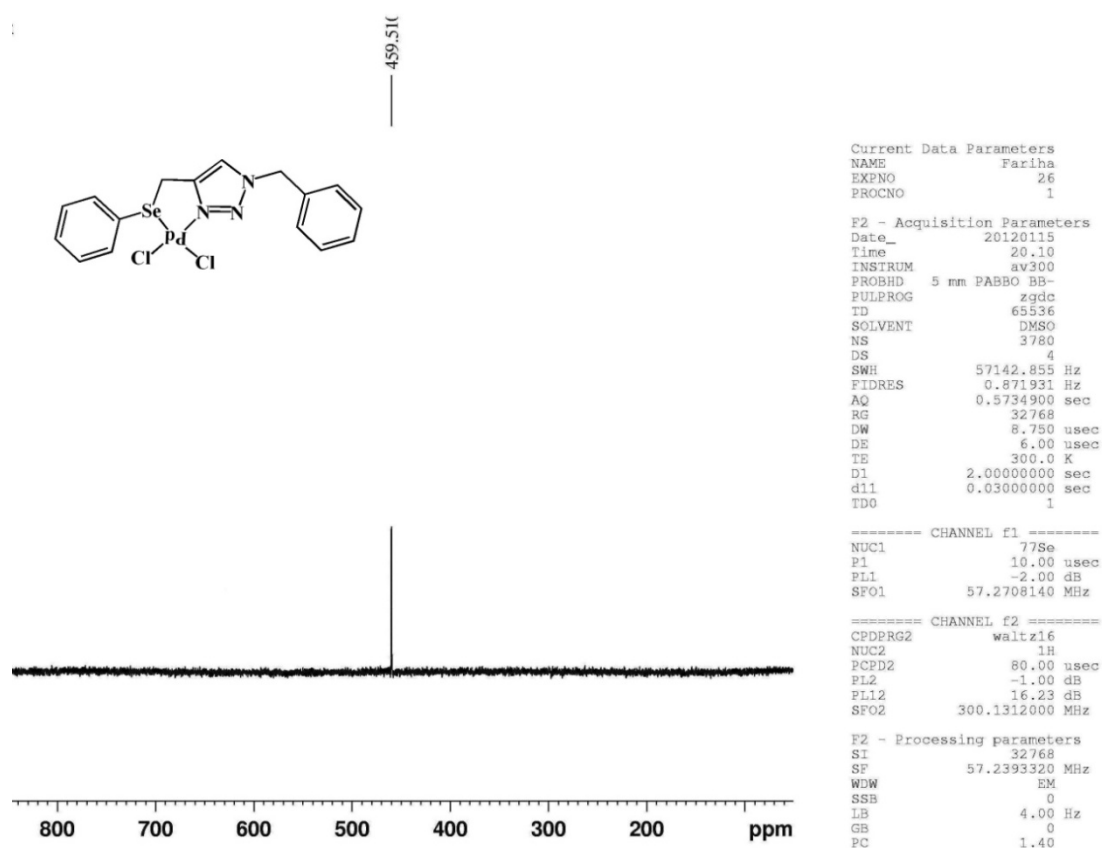

Fig. S7  $^{77}\text{Se}\{^1\text{H}\}$  NMR spectrum of **2**

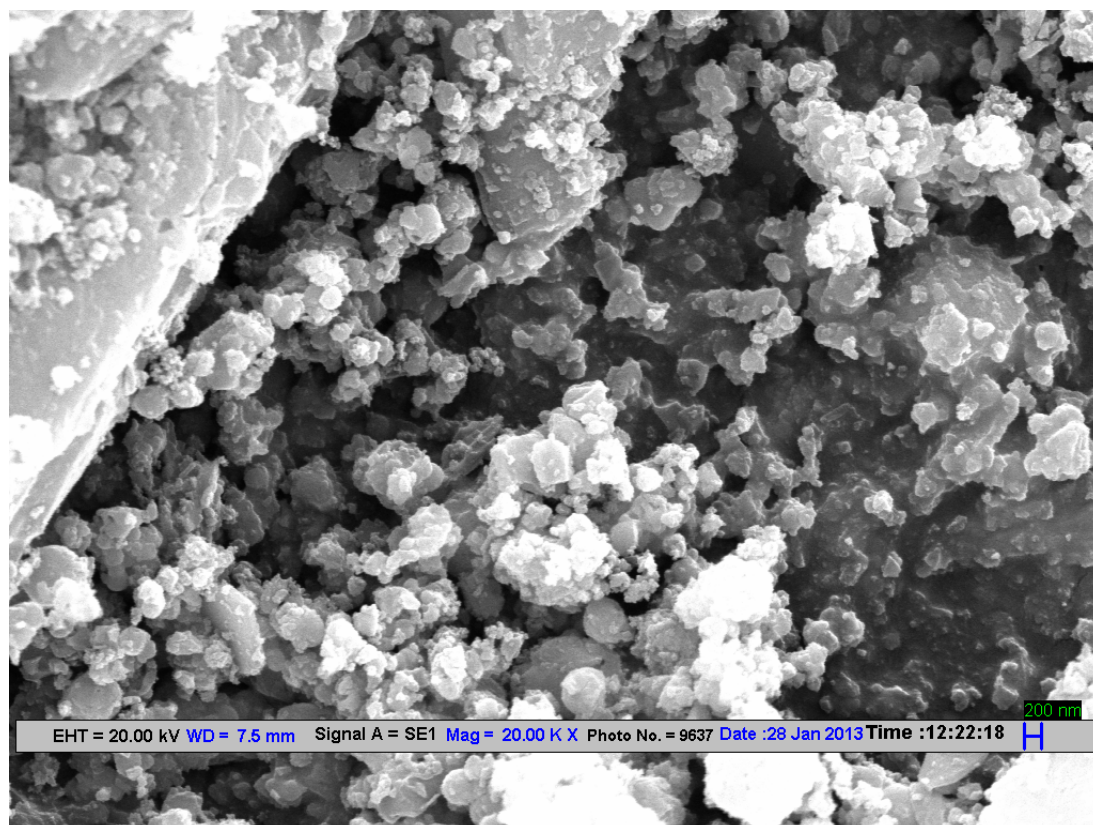

Fig. S8 SEM image of NPs obtained from **1** during Suzuki-Miyaura reaction

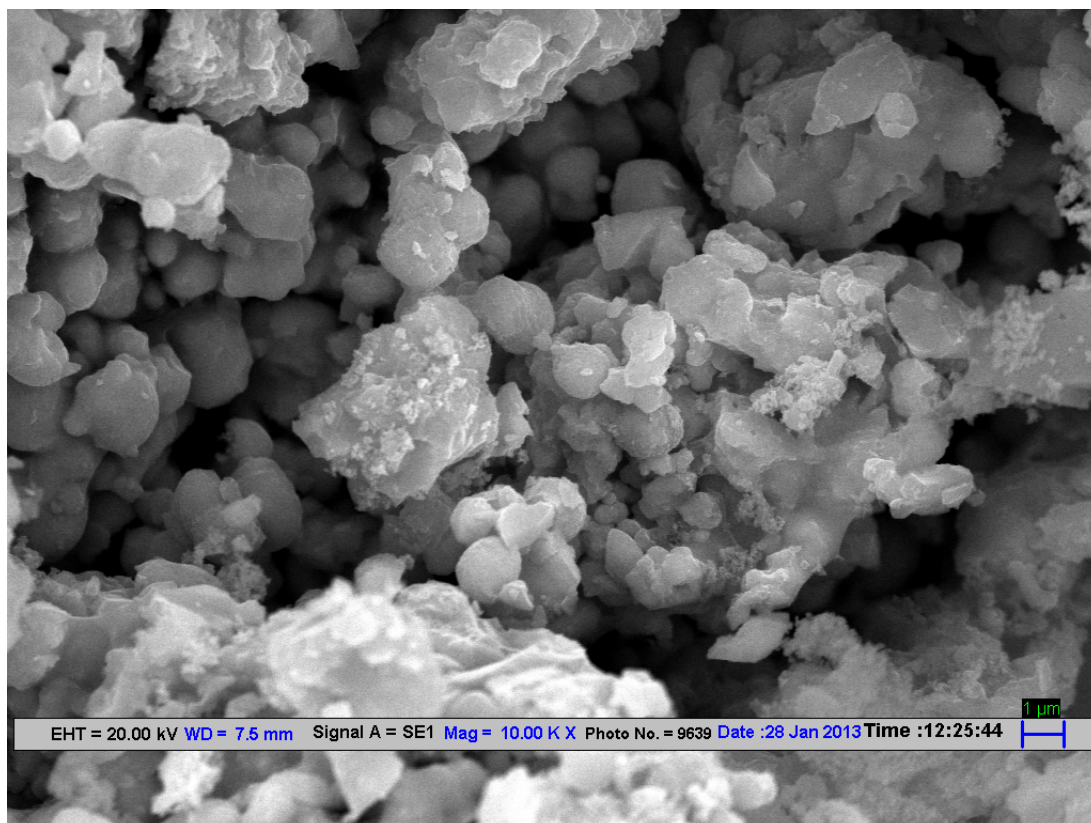

**Fig. S9** SEM image of NPs obtained from **2** during Suzuki-Miyaura reaction

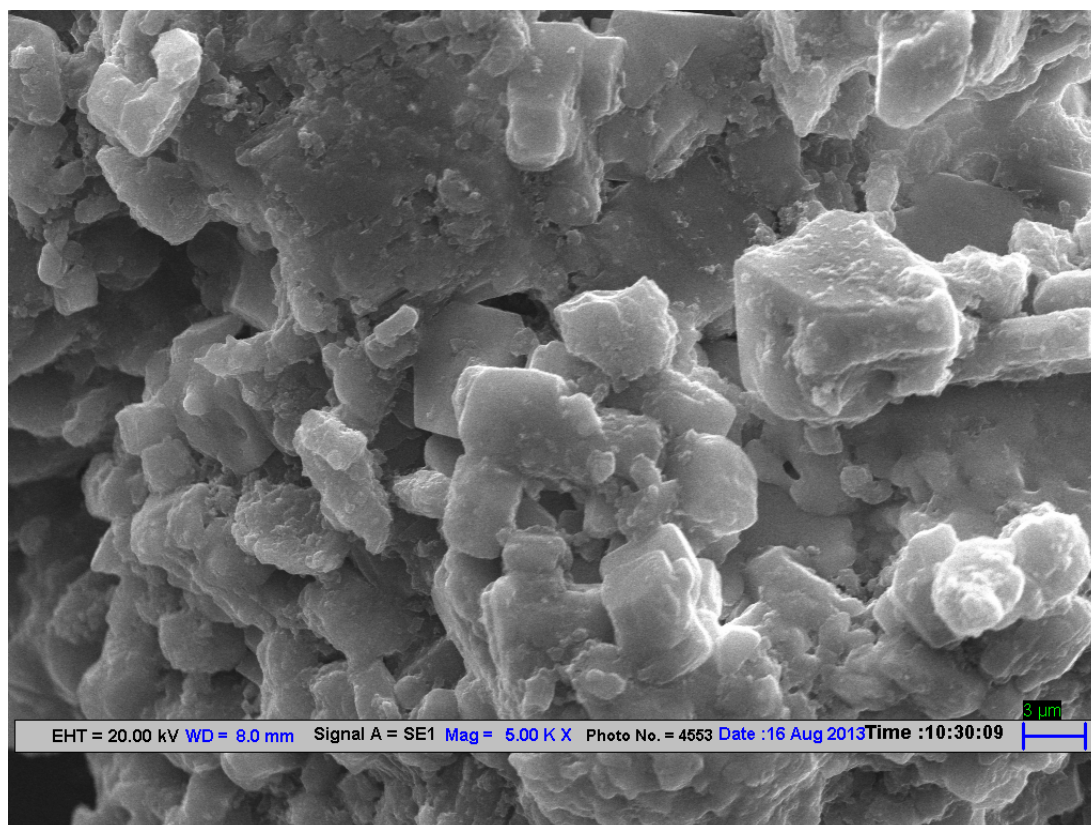

**Fig. S10** SEM image of NPs obtained from **1** during Heck reaction



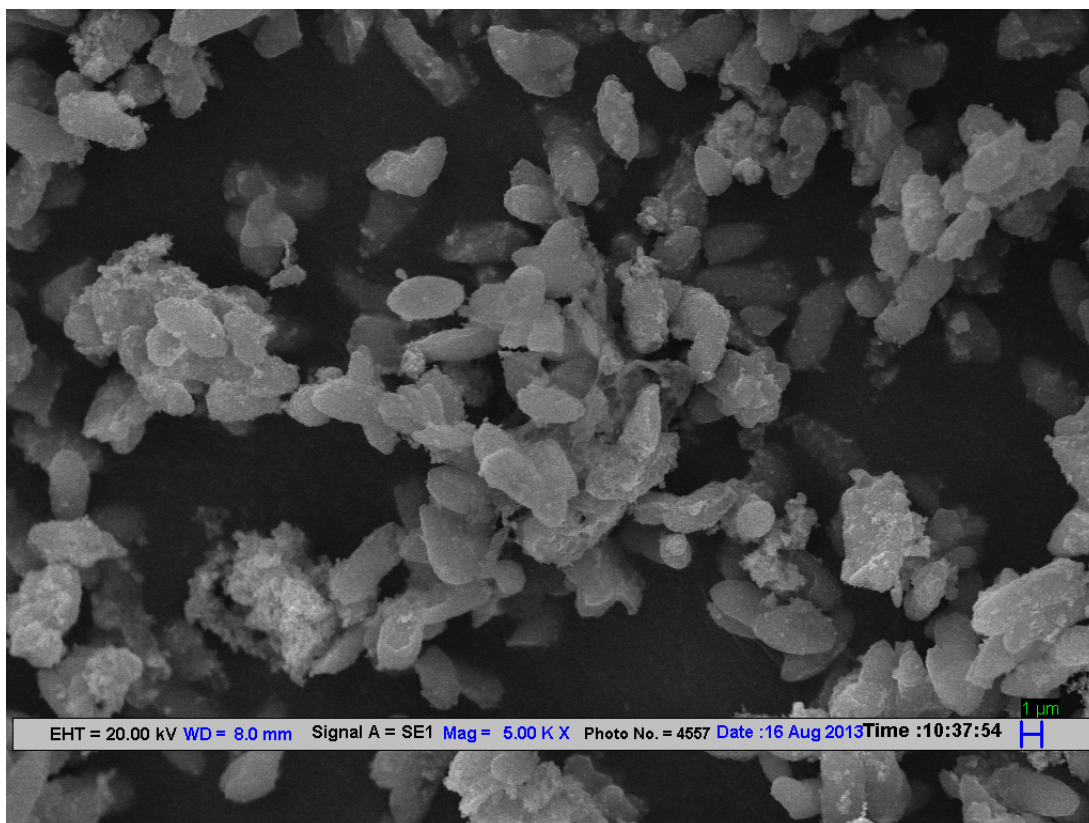

**Fig. S11** SEM image of NPs obtained from **2** during Heck reaction

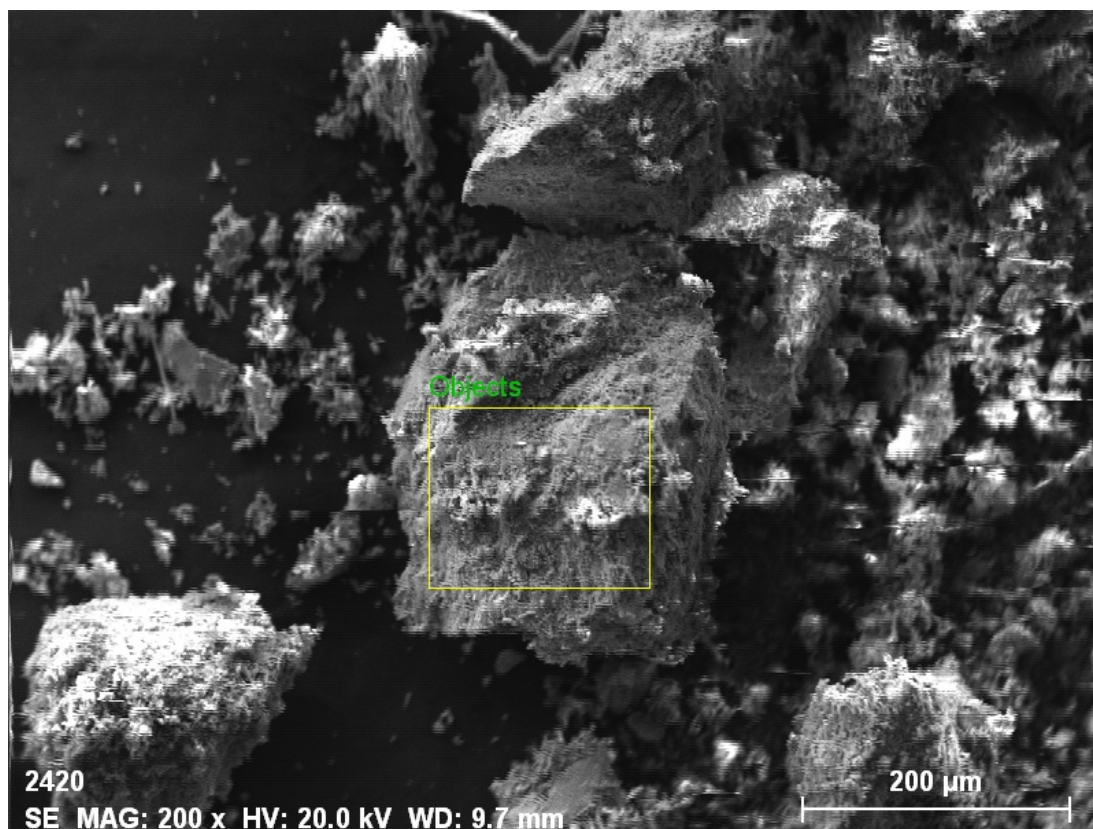

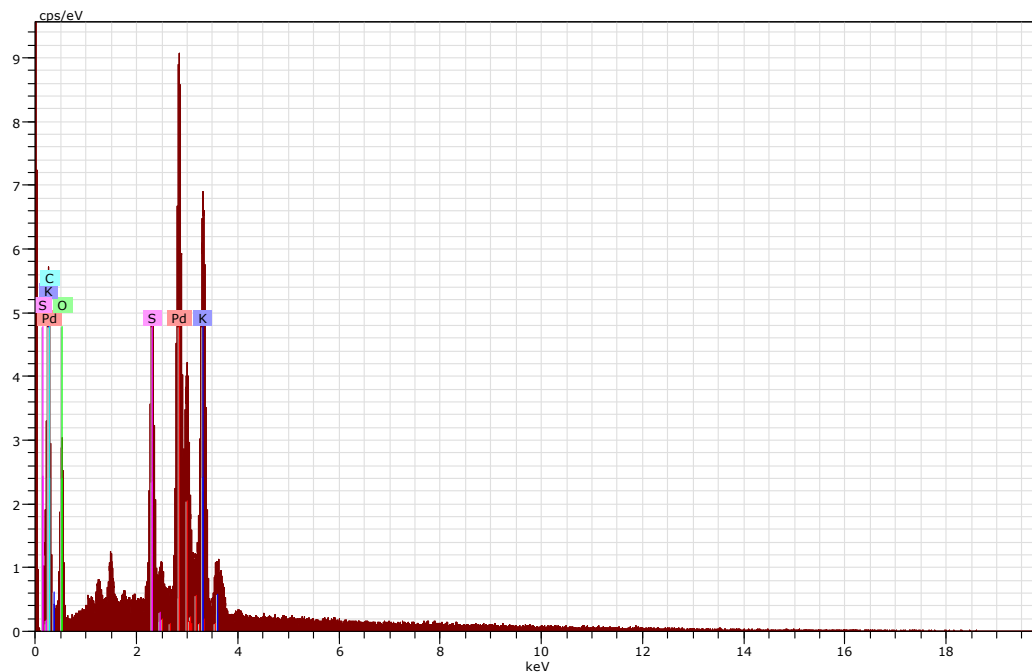

**Fig. S12** SEM-EDX image NPs obtained from **1** during Suzuki-Miyaura reaction

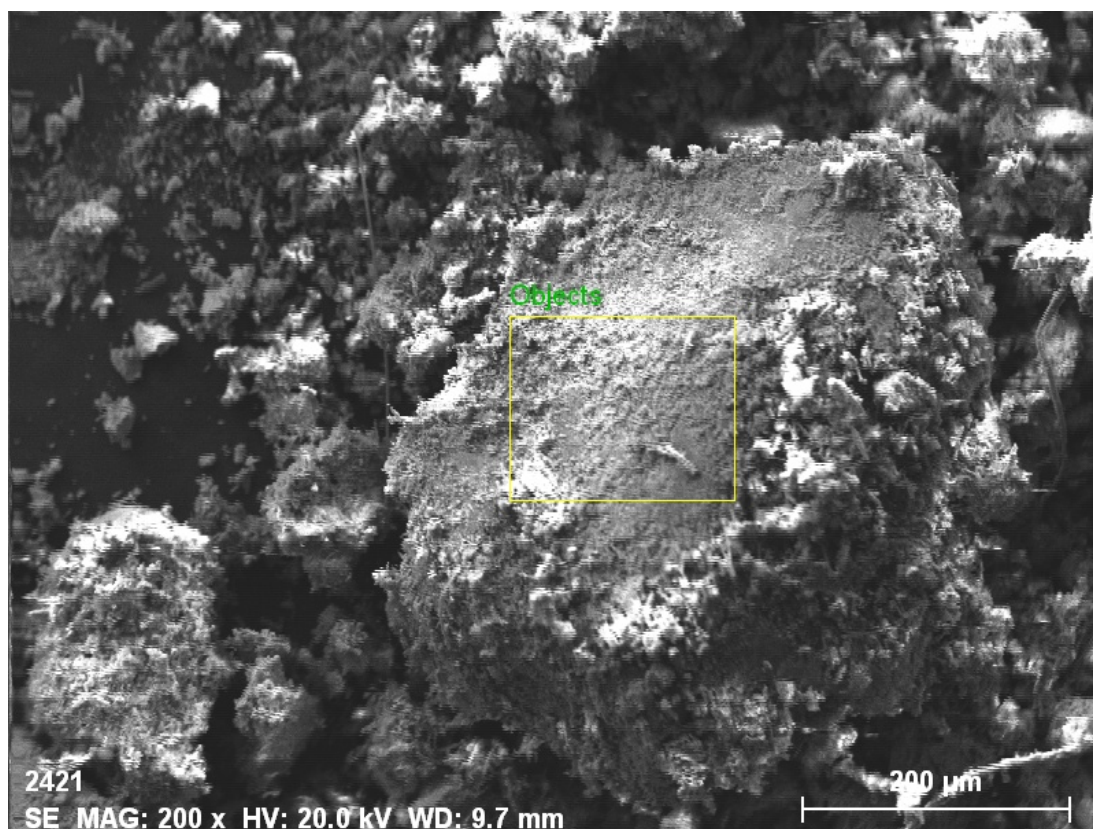



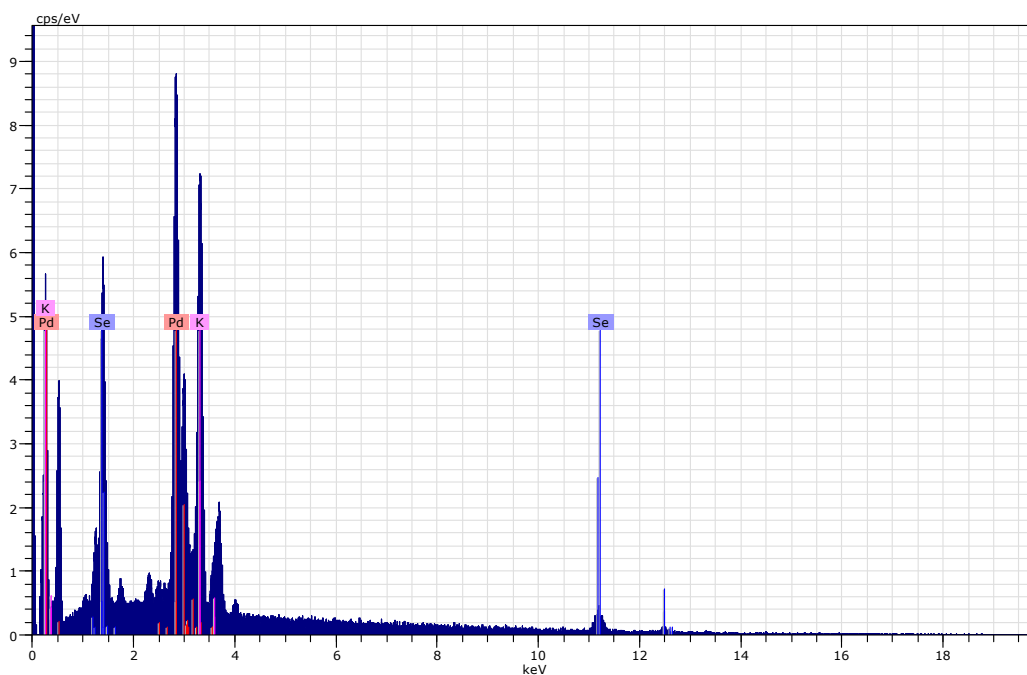

**Fig. S13** SEM-EDX image NPs obtained from **2** during Suzuki-Miyaura reaction

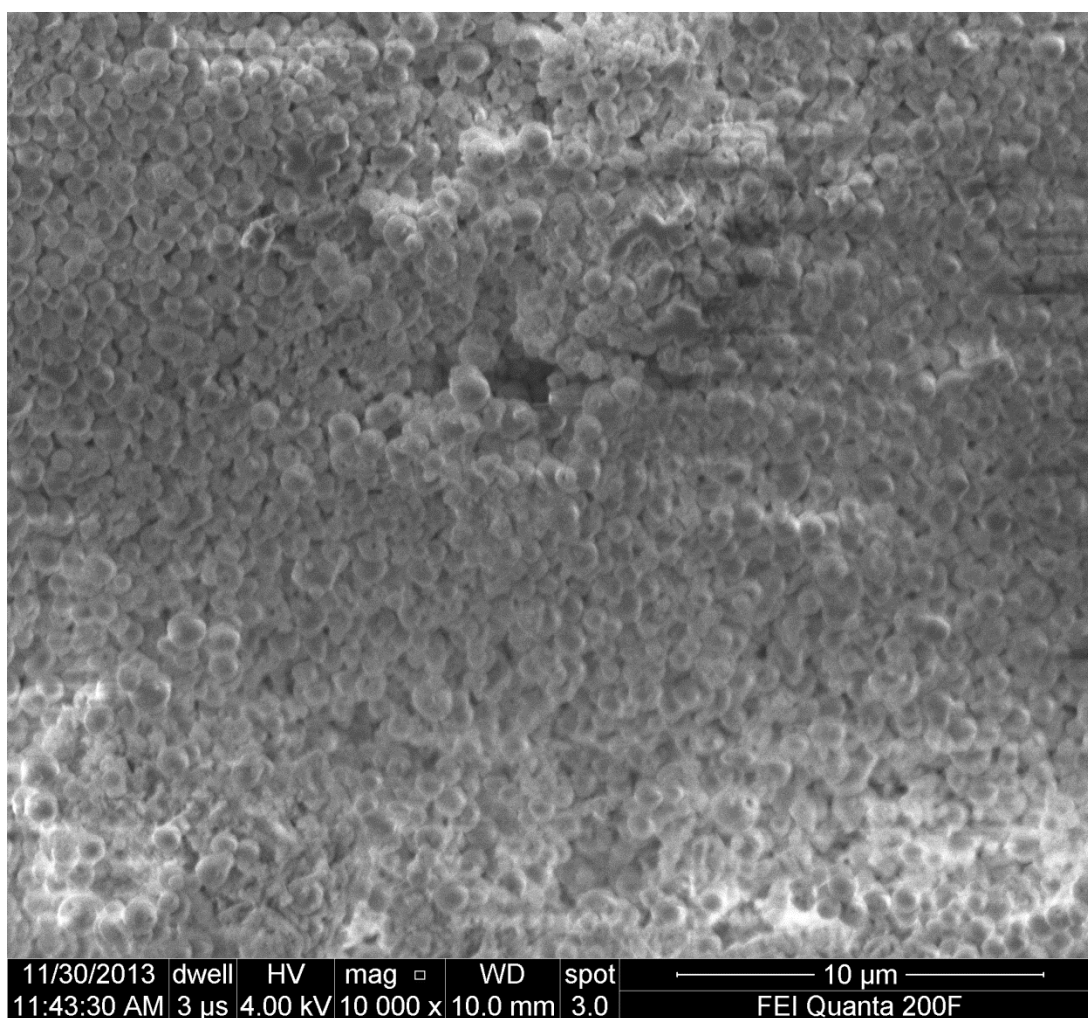

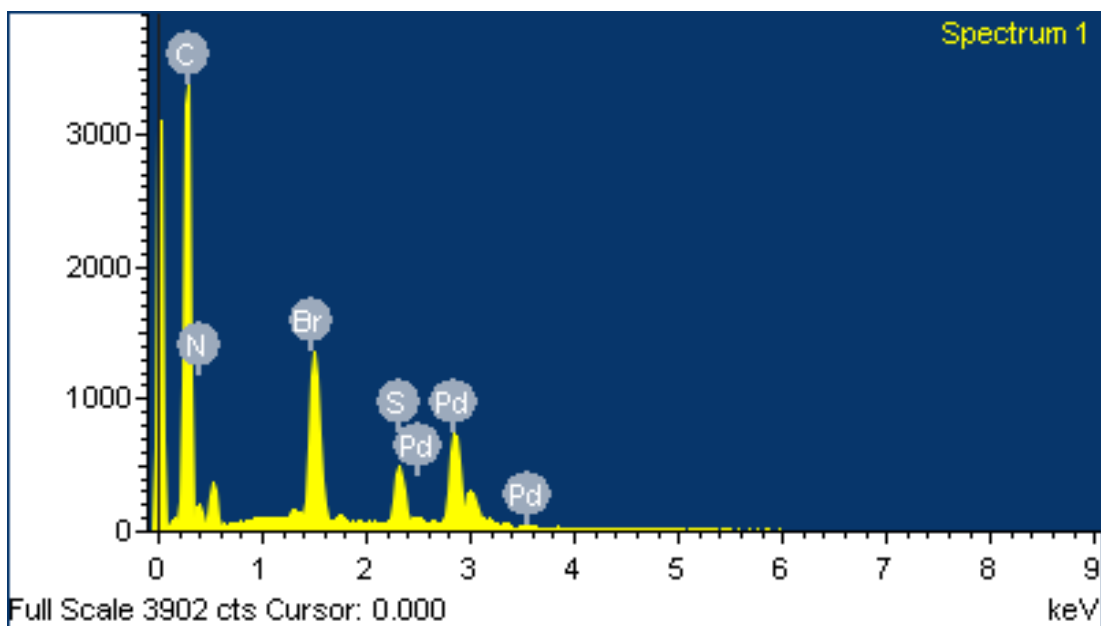

**Fig. S14** SEM-EDX image NPs obtained from **1** during Heck reaction

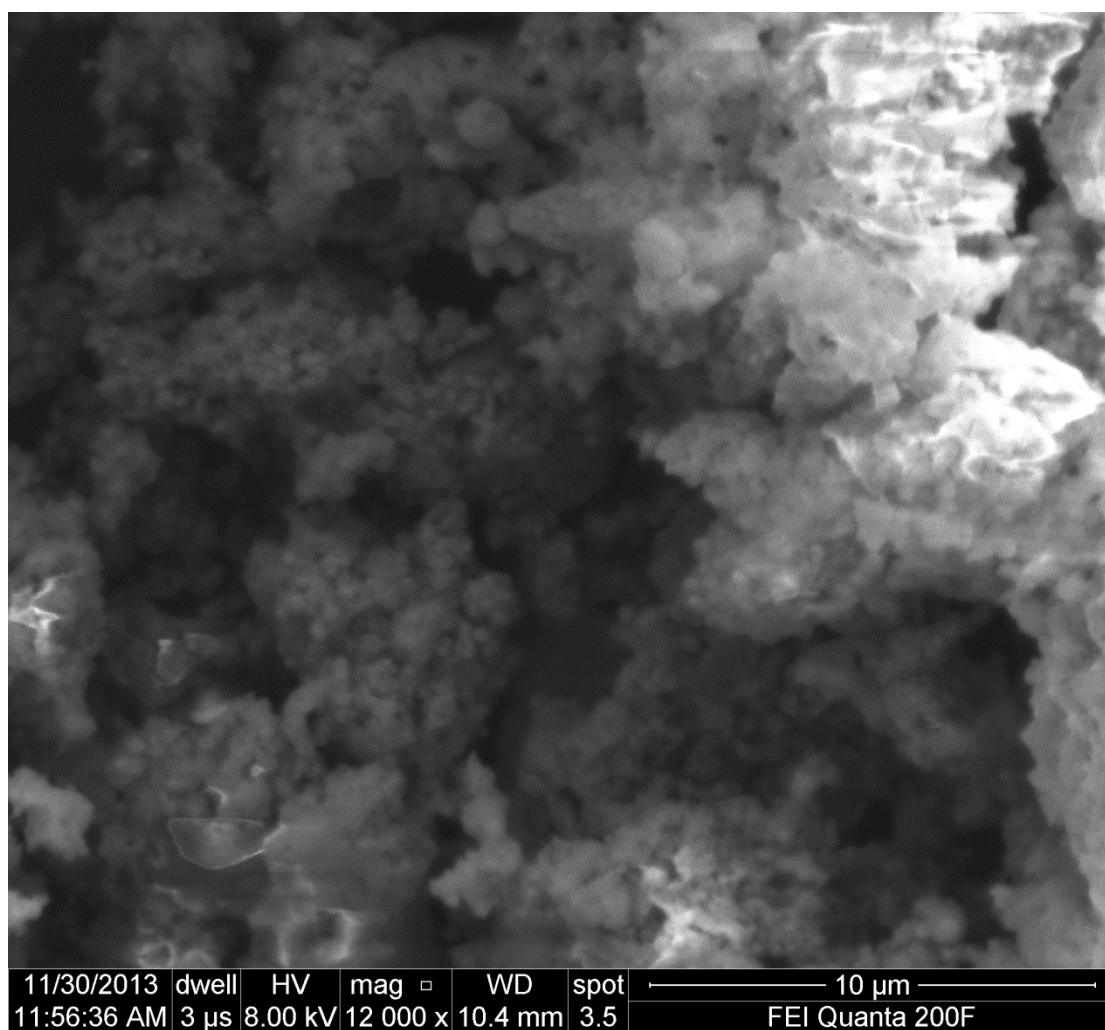



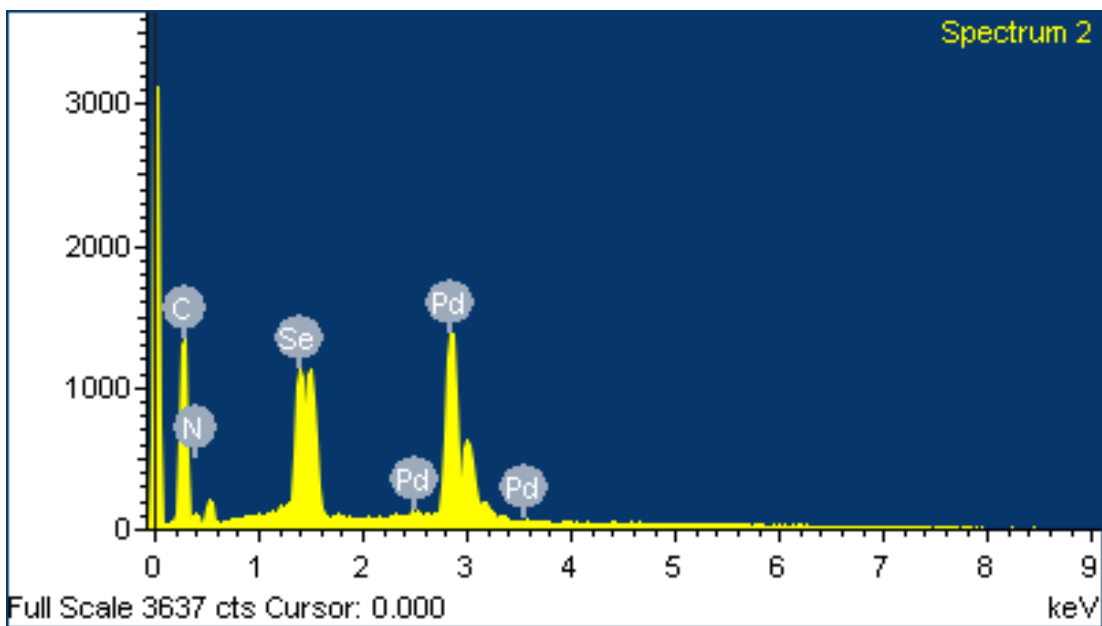

Fig. S15 SEM-EDX image NPs obtained from 2 during Heck reaction

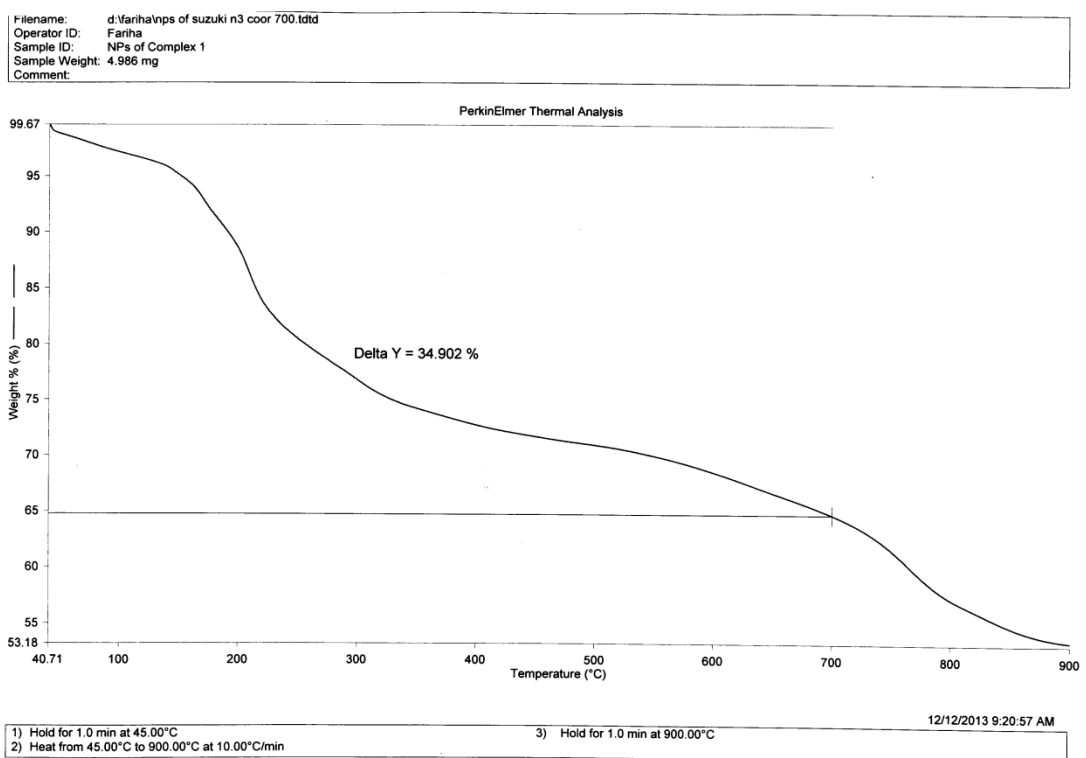

Fig. S16 TGA of NPs obtained from 1 during Suzuki-Miyaura reaction

Filename: D:\Fariha...nps of 2 suzuki n3 coor 700.ttdt  
Operator ID: Fariha  
Sample ID: NPs of Complex 2  
Sample Weight: 3.092 mg  
Comment:

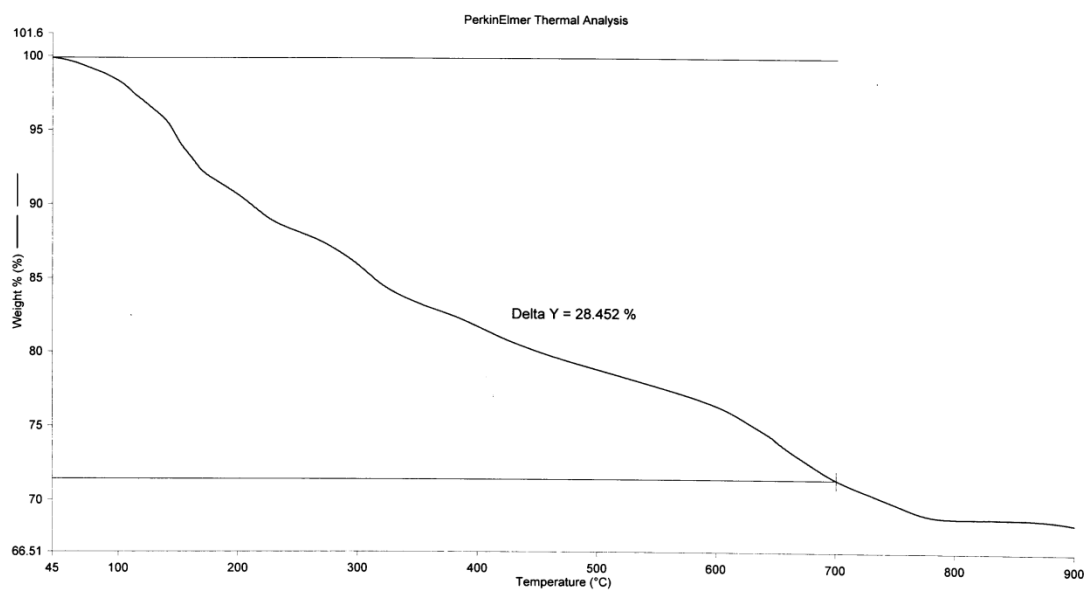

1) Hold for 1.0 min at 45.00°C  
2) Heat from 45.00°C to 900.00°C at 10.00°C/min  
3) Hold for 1.0 min at 900.00°C  
12/12/2013 9:34:04 AM

**Fig. S17** TGA of NPs obtained from **2** during Suzuki-Miyaura reaction

Filename: d:\Fariha...Fariha nps of heck pd-s 700.ttdt  
Operator ID: fariha  
Sample ID: fariha Nps of Heck Pd-S  
Sample Weight: 3.406 mg  
Comment:

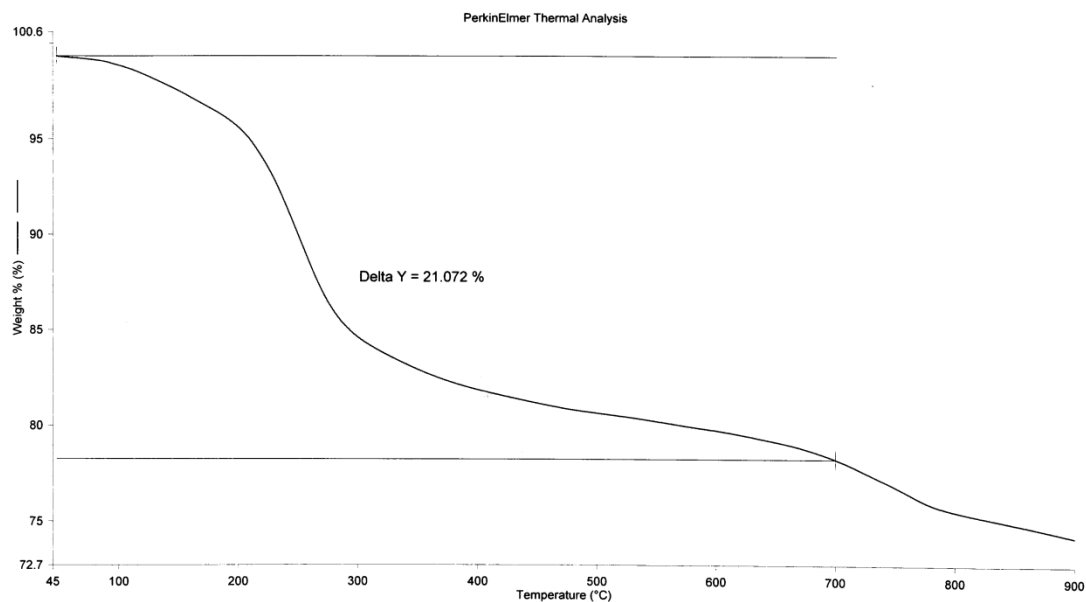

1) Heat from 45.00°C to 900.00°C at 10.00°C/min  
2) Hold for 1.0 min at 900.00°C  
12/12/2013 9:27:53 AM

**Fig. S18** TGA of NPs obtained from **1** during Heck reaction

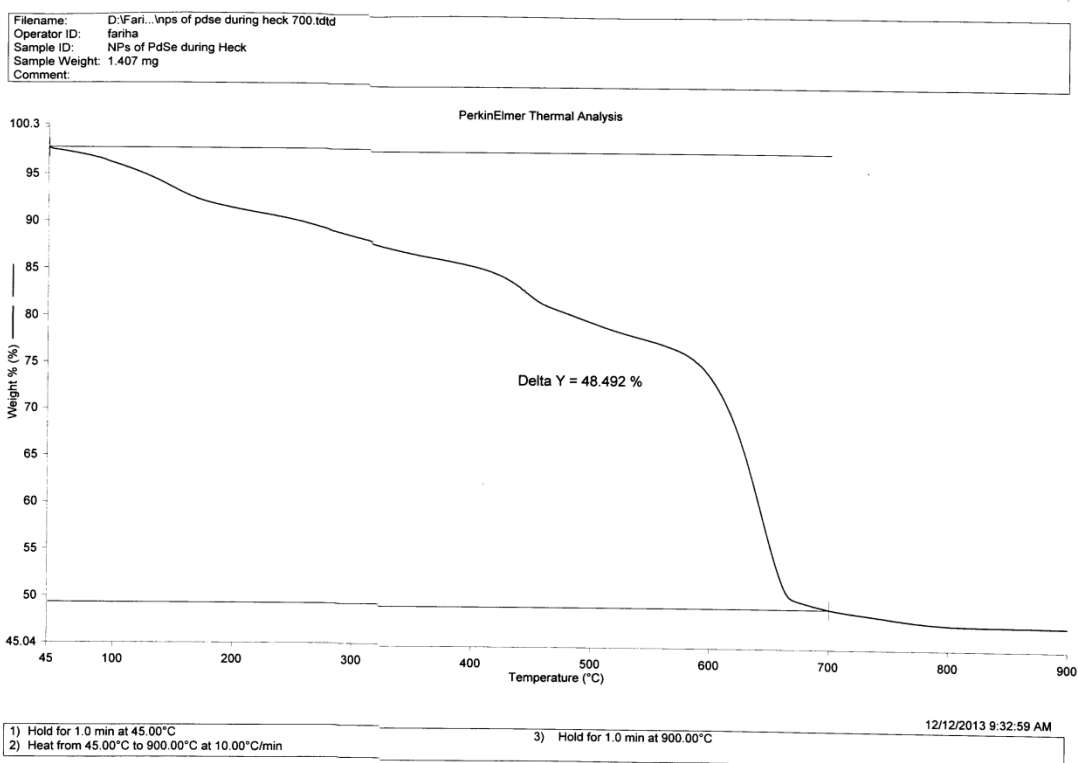

**Fig. S19** TGA of NPs obtained from **2** during Heck reaction

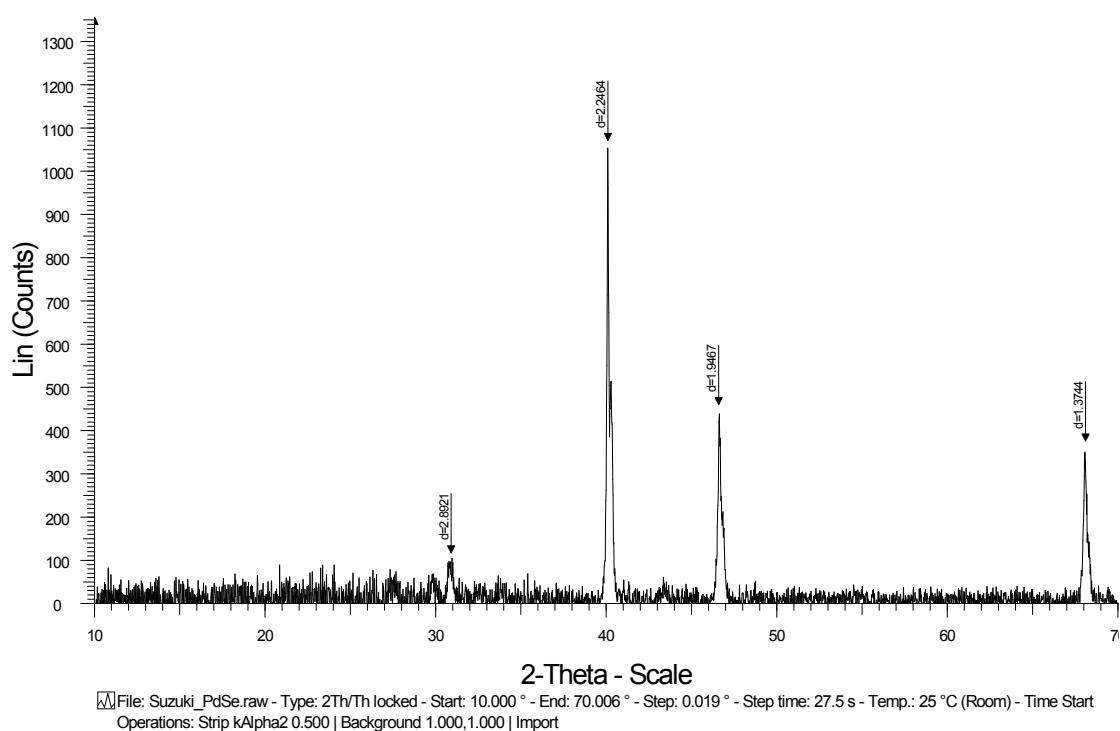

**Fig. S20** PXRD of NPs after annealing obtained from **1** during Suzuki-Miyaura reaction

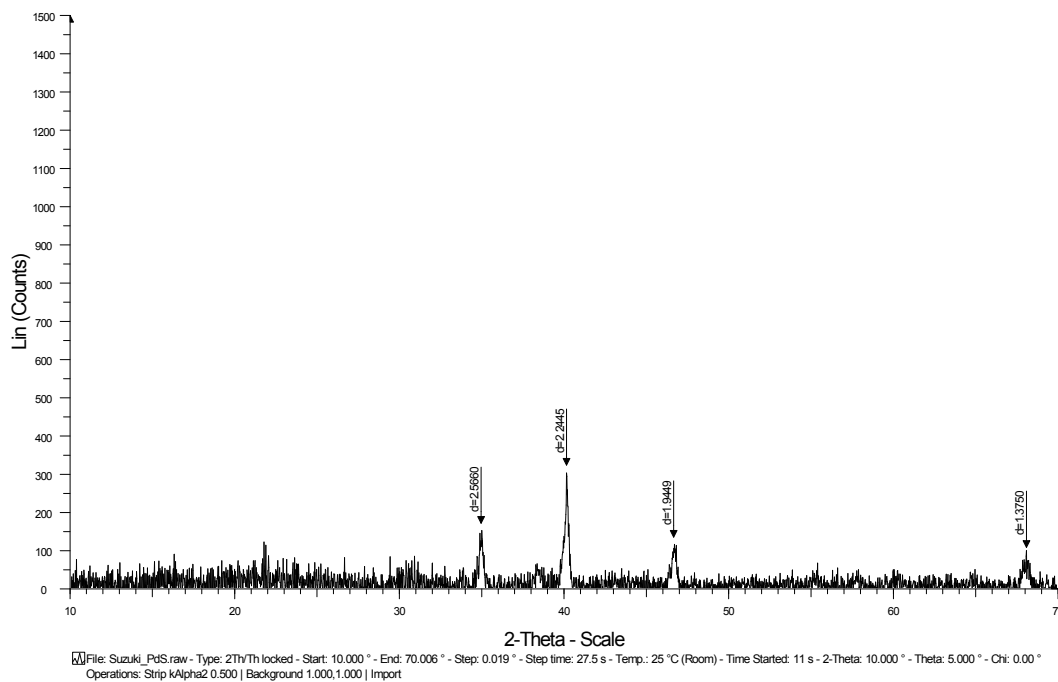

**Fig.S21** PXR D of NPs after annealing obtained from **2** during Suzuki-Miyaura reaction

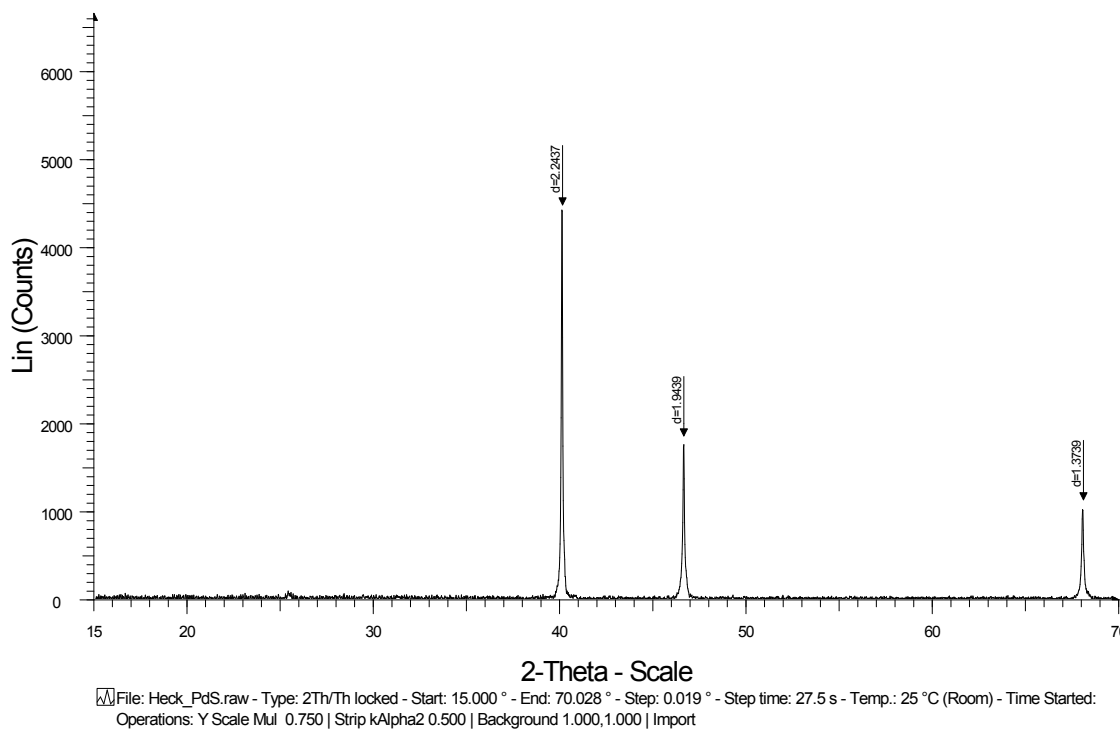

**Fig. S22** PXR D of NPs after annealing obtained from **1** during Heck reaction

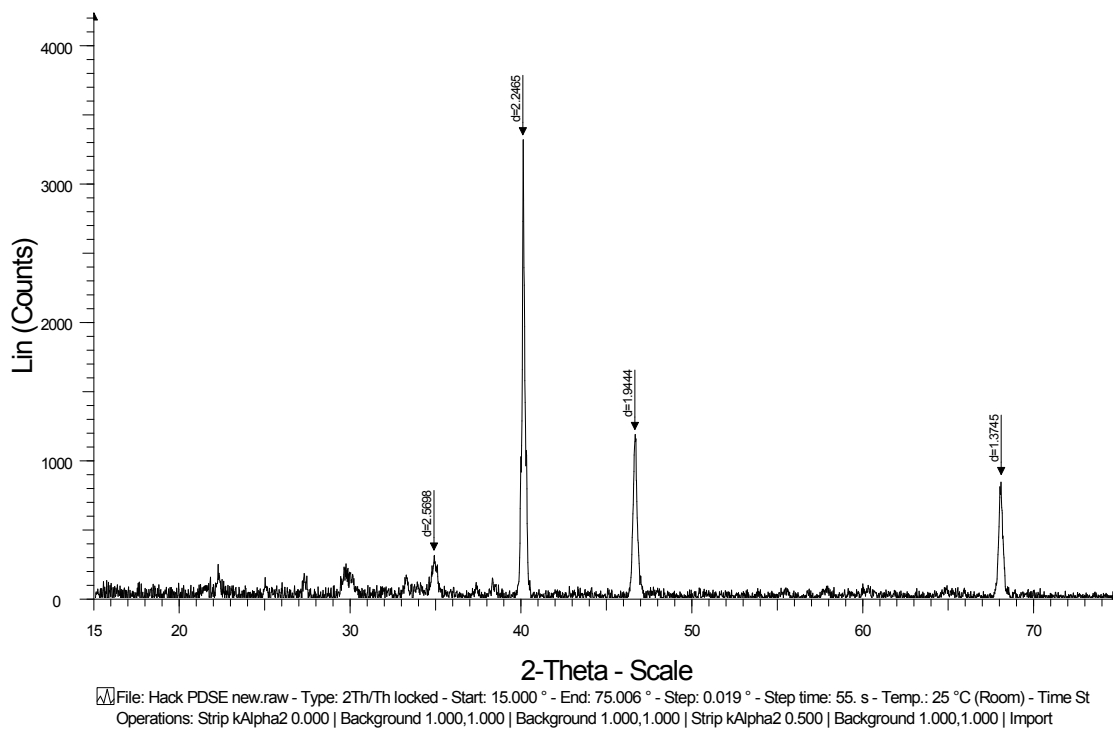

**Fig. S23** PXRD of NPs after annealing obtained from **2** during Heck reaction

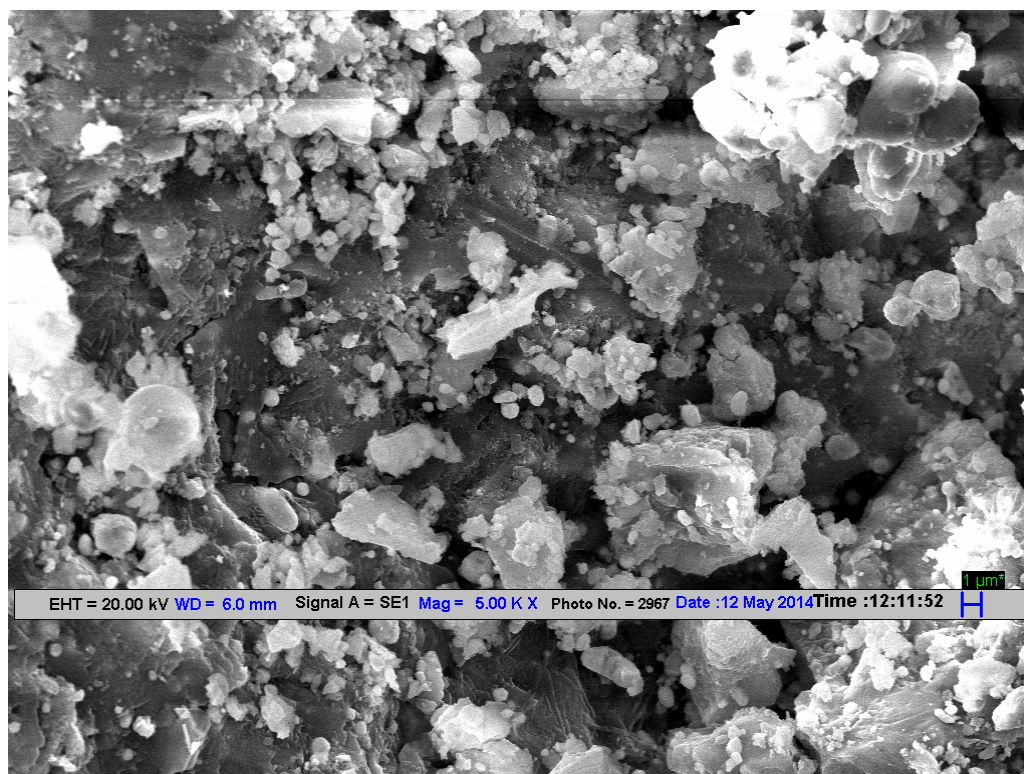

**Fig. S24** SEM image of NPs after annealing obtained from **1** during Suzuki-Miyaura reaction

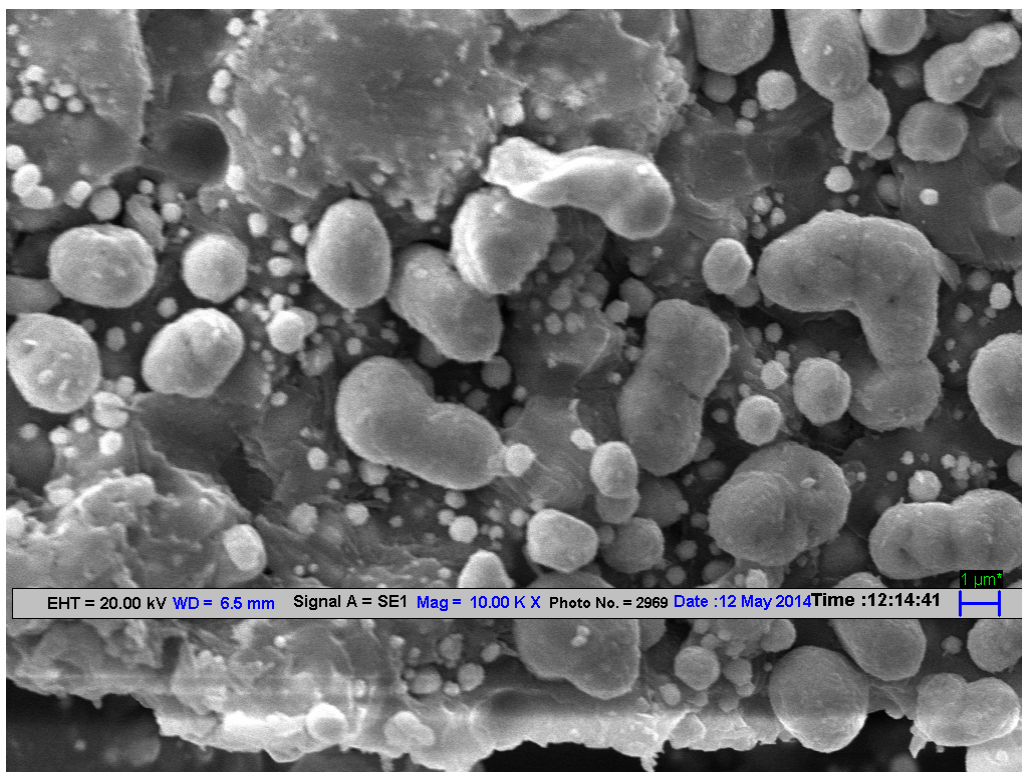

**Fig. S25** SEM image of NPs after annealing obtained from **2** during Suzuki-Miyaura reaction

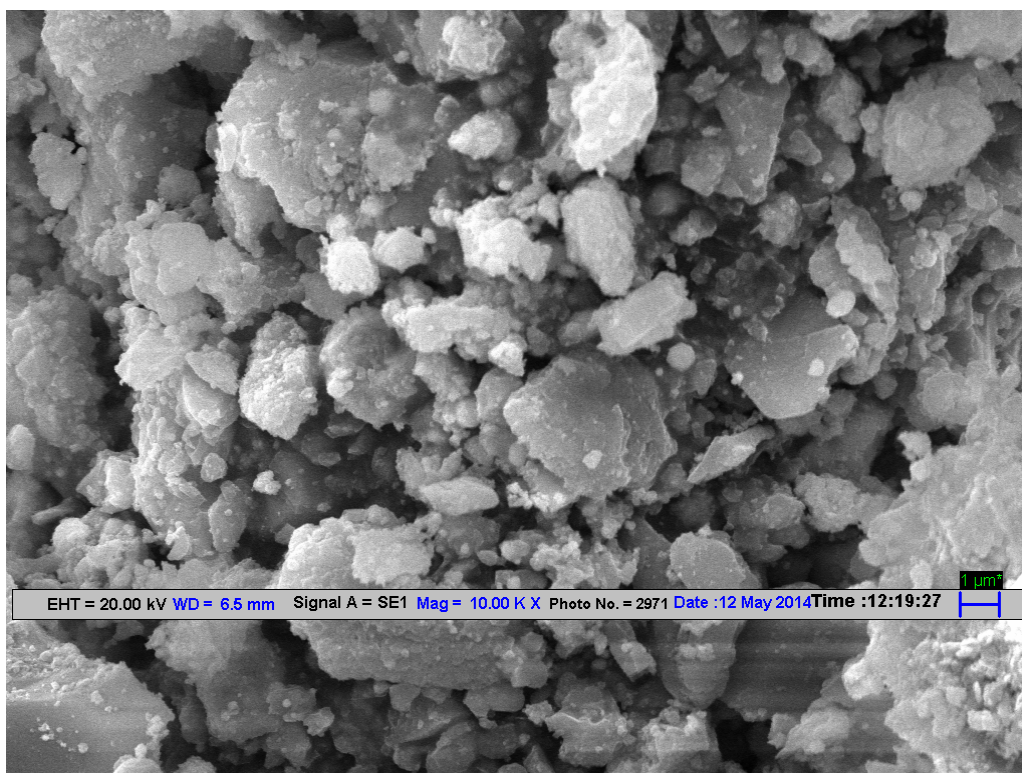

**Fig. S26** SEM image of NPs after annealing obtained from **1** during Heck reaction



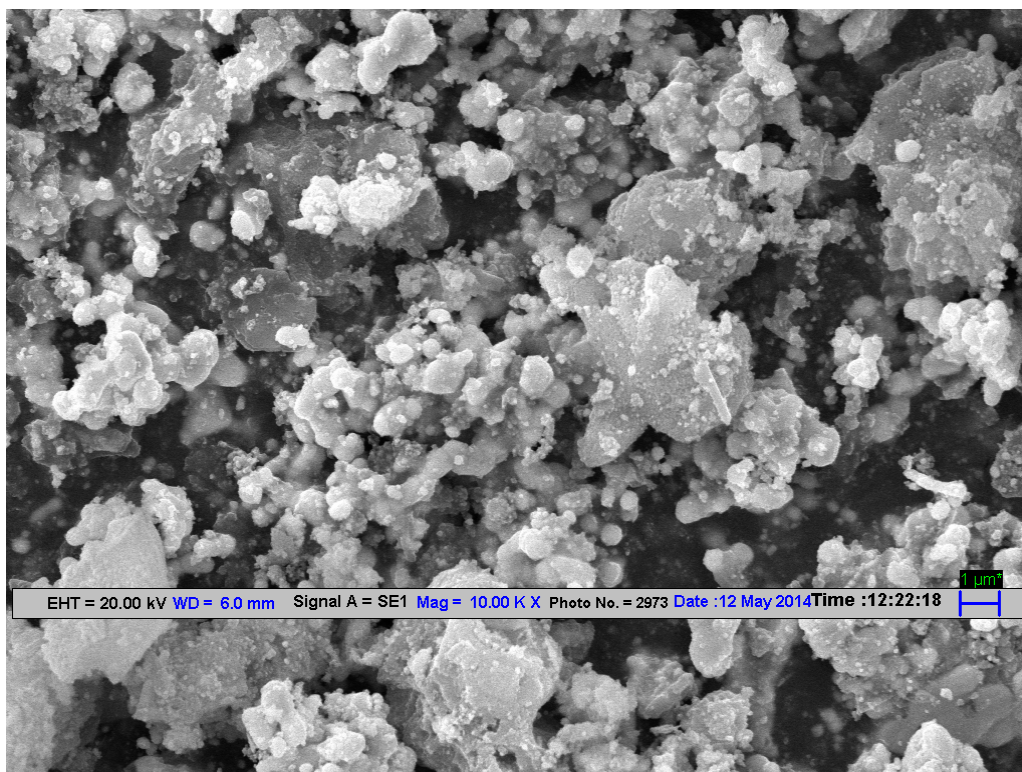

**Fig. S27** SEM image of NPs after annealing obtained from **2** during Heck reaction

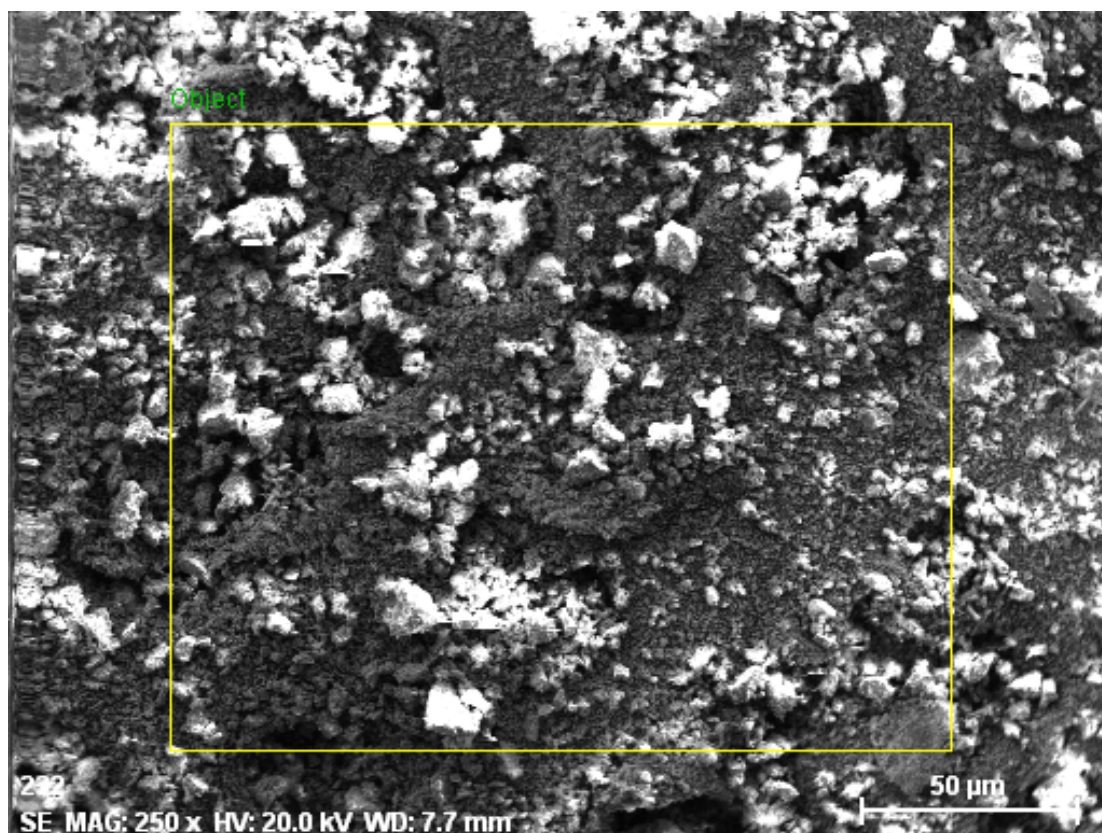

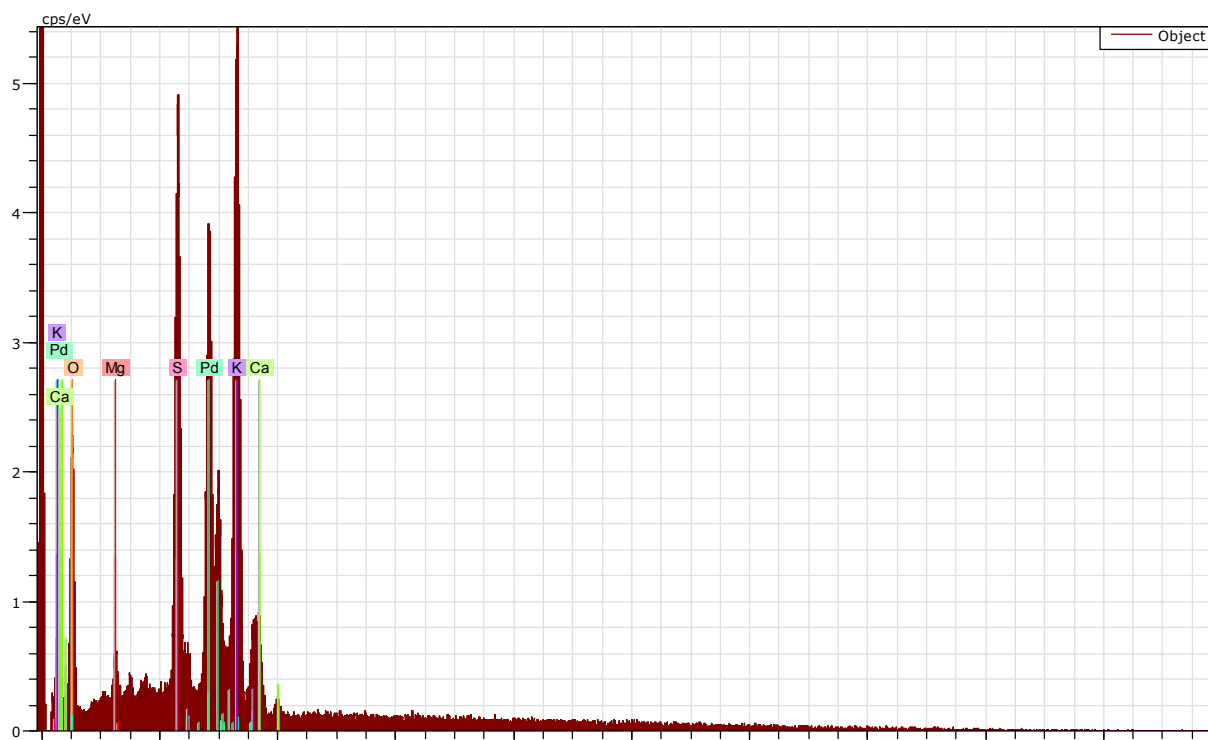

**Fig. S28** SEM-EDX image of NPs after annealing obtained from **1** during Suzuki-Miyaura reaction

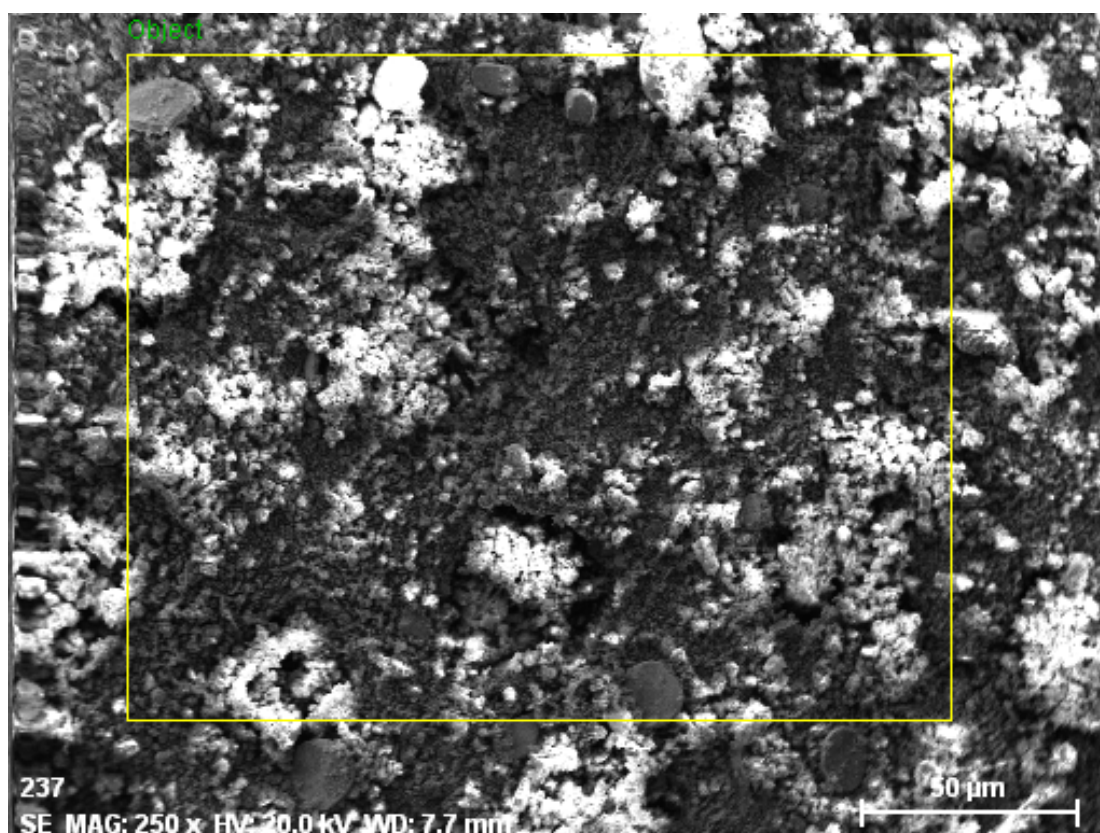



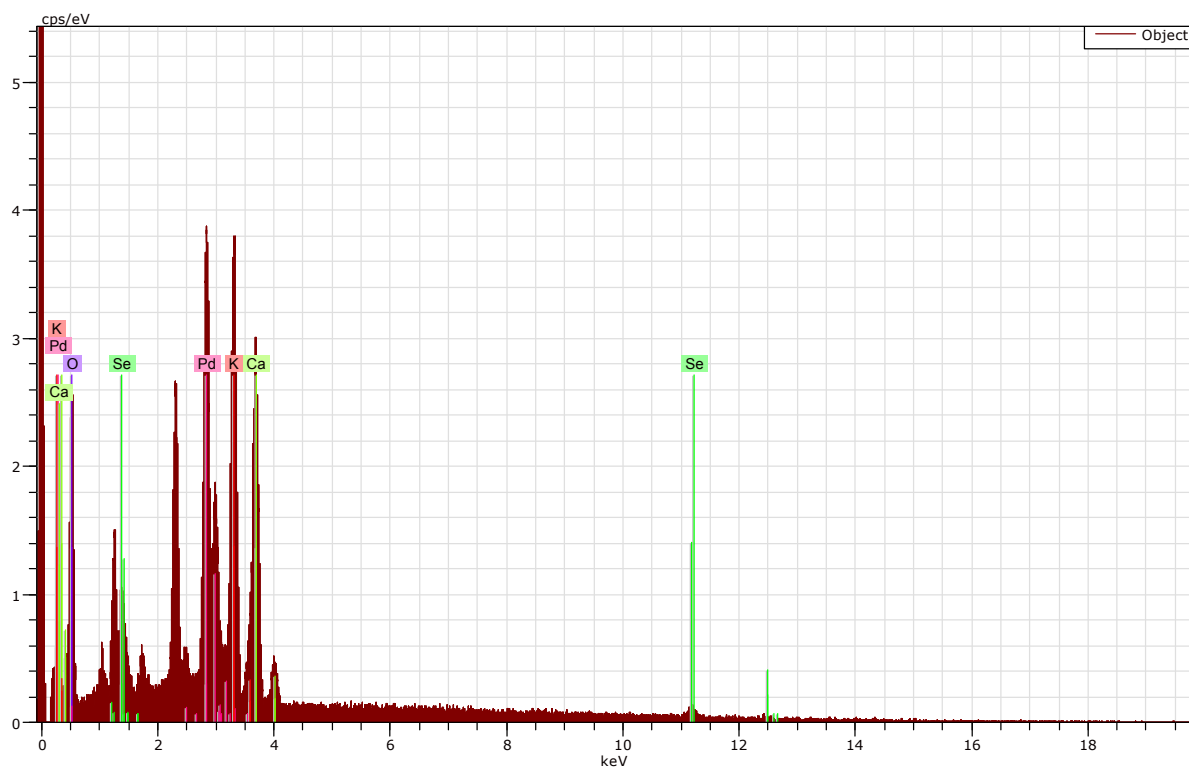

**Fig. S29** SEM-EDX image of NPs after annealing obtained from **2** during Suzuki-Miyaura reaction

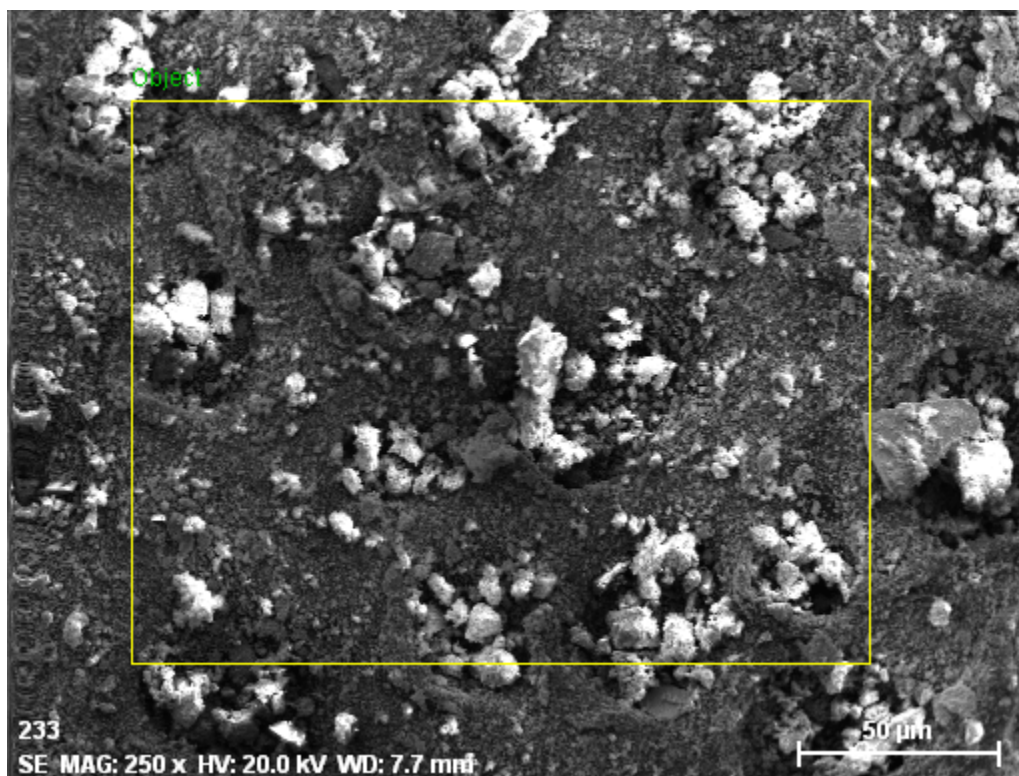

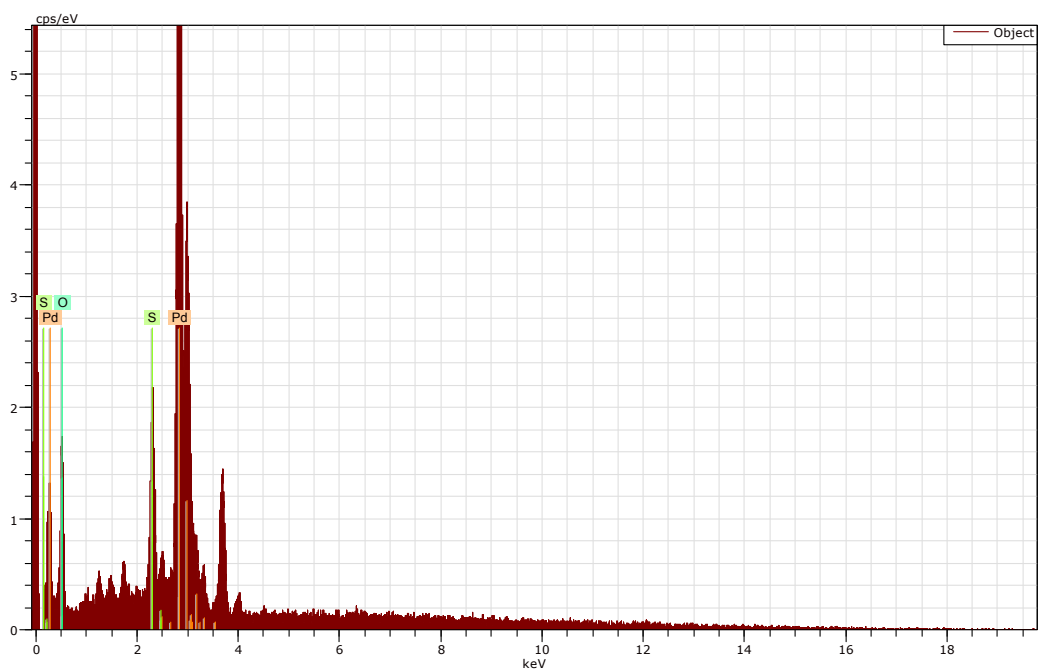

**Fig. S30** SEM-EDX image of NPs after annealing obtained from **1** during Heck reaction

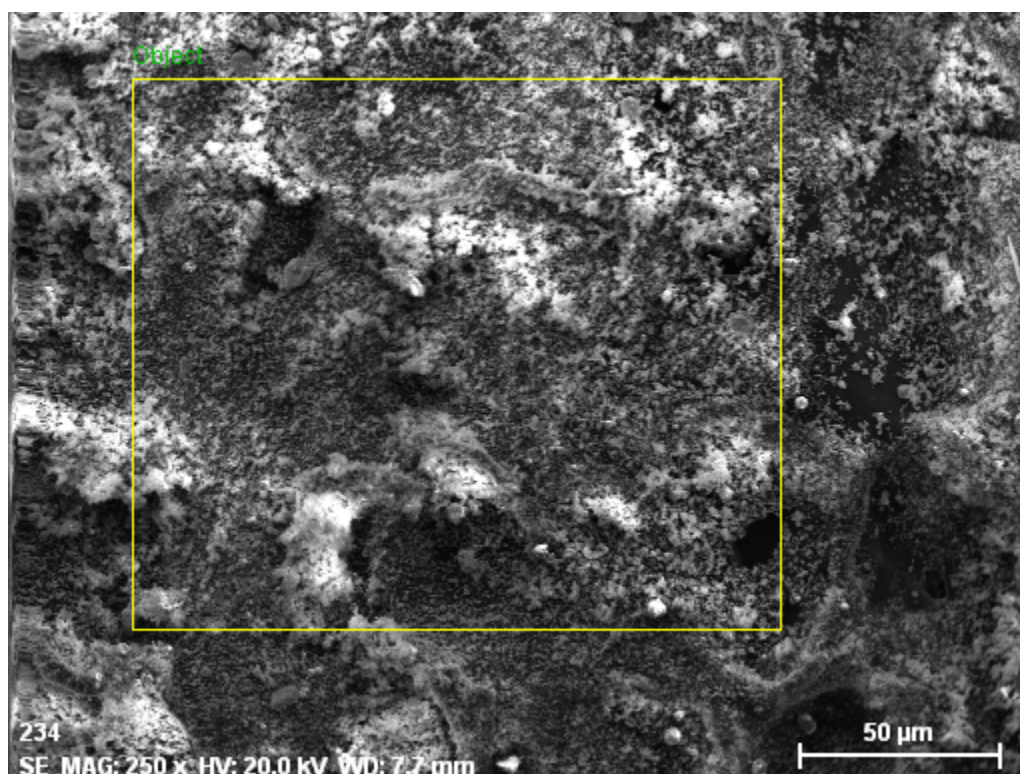

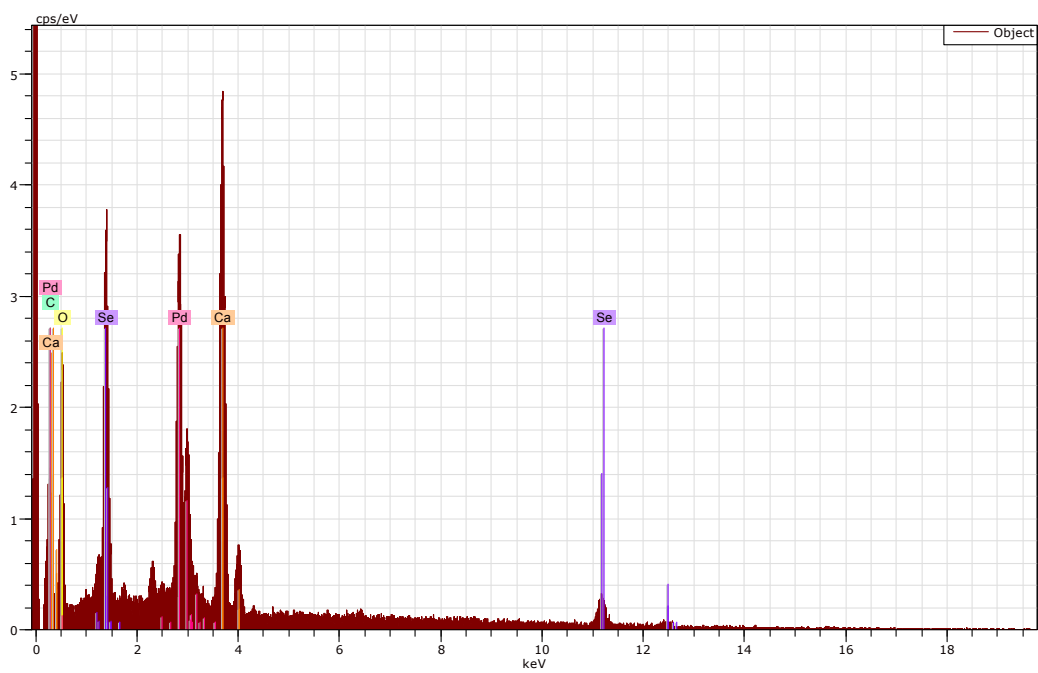

**Fig. S31** SEM-EDX image of NPs after annealing obtained from **2** during Heck reaction
